# Supplementary material for: mTORC1 couples cyst(e)ine availability with GPX4 protein synthesis and ferroptosis regulation
Source: PubMed Central journal article supplement (PMC7952727; doi:10.1038/s41467-021-21841-w), 2021-03-11

## Supplementary Information

### **mTORC1 couples cyst(e)ine availability with GPX4 protein synthesis and ferroptosis regulation**

Yilei Zhang<sup>1</sup>, Robert V. Swanda<sup>2</sup>, Litong Nie<sup>1</sup>, Xiaoguang Liu<sup>1</sup>, Chao Wang<sup>1</sup>, Hyemin Lee<sup>1</sup>, Guang Lei<sup>1</sup>, Chao Mao<sup>1</sup>, Pranavi Koppula<sup>1, 3</sup>, Weijie Cheng<sup>1</sup>, Jie Zhang<sup>1</sup>, Zhenna Xiao<sup>4</sup>, Li Zhuang<sup>1</sup>, Bingliang Fang<sup>5</sup>, Junjie Chen<sup>1</sup>, Shu-Bing Qian<sup>2, 6</sup>, Boyi Gan<sup>1, 3\*</sup>

<sup>1</sup> Department of Experimental Radiation Oncology, the University of Texas MD Anderson Cancer Center, Houston, TX 77030, USA.

<sup>2</sup> Graduate Field of Biomedical and Biological Sciences, Cornell University, Ithaca, NY 14853, USA.

<sup>3</sup> The University of Texas MD Anderson UTHHealth Graduate School of Biomedical Sciences, Houston, Texas 77030, USA.

<sup>4</sup> Department of Genetics, the University of Texas MD Anderson Cancer Center, Houston, TX 77030, USA.

<sup>5</sup> Department of Thoracic and Cardiovascular Surgery, the University of Texas MD Anderson Cancer Center, Houston, TX 77030, USA.

<sup>6</sup> Division of Nutritional Sciences, Cornell University, Ithaca, NY 14853, USA.

Keywords: ferroptosis, cysteine, cystine, GPX4, mTORC1, protein synthesis, cancer treatment

\* Corresponding Author: Boyi Gan. E-mail: [bgan@mdanderson.org](mailto:bgan@mdanderson.org); Phone: 713-792-8653.

# Supplementary Figure 1

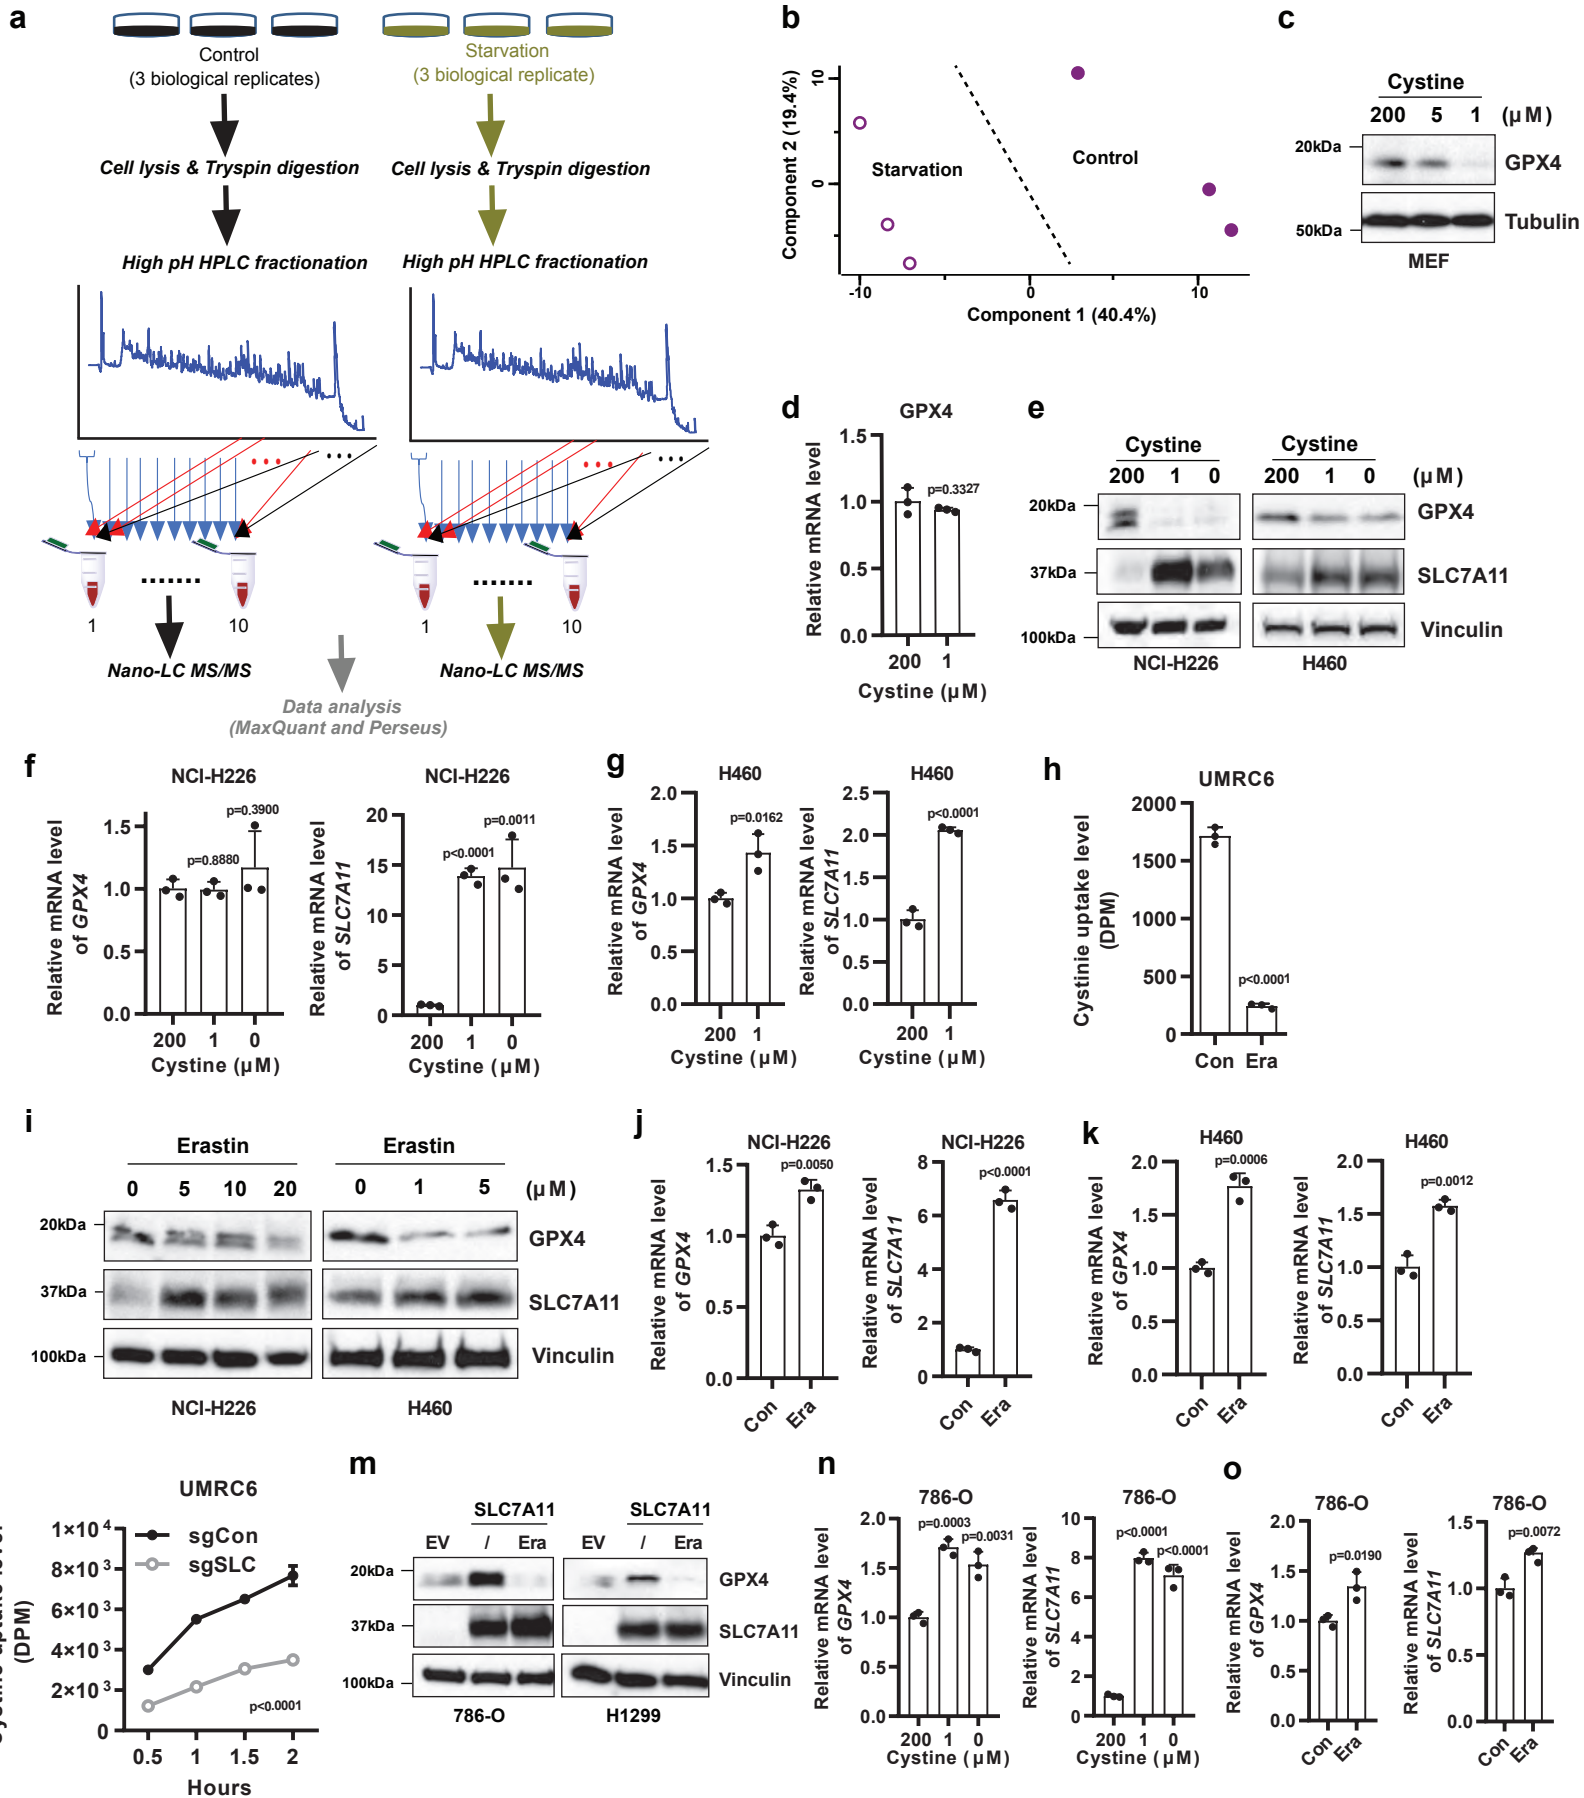

**Supplementary Figure 1. SLC7A11-mediated cystine uptake promotes GPX4 protein expression.**

**a** The flowchart of experimental design for proteomic studies. **b** Samples in triplicate were separated into 2 parts (Treatment and Control) using 2-dimensional principal component analyses. **c** Mouse Embryonic Fibroblast (MEF) cells were cultured in media with indicated concentration of cystine for 20 hours. Protein levels were evaluated by Western blotting. **d** *GPX4* gene mRNA level was measured by RT-PCR in MEFs cultured in media with indicated concentration of cystine for 20 hours. n=3. **e** NCI-H226 and H460 cells were cultured in media with indicated concentration of cystine for 24 hours. GPX4 and SLC7A11 protein levels were evaluated by Western blotting. **f-g** *GPX4* and *SLC7A11* gene mRNA levels were measured by RT-PCR in NCI-H226 (**f**) and H460 (**g**) cells treated as described in **e**. n=3. **h** Cystine uptake levels measured in UMRC6 cells treated with or without 10  $\mu$ M erastin for 20 hours. n=3. **i** NCI-H226 and H460 cells were cultured in media with indicated concentration of erastin for 24 hours. GPX4 and SLC7A11 protein levels were evaluated by Western blotting. **j** *GPX4* and *SLC7A11* gene mRNA levels were measured by RT-PCR in NCI-H226 cells treated with 20  $\mu$ M erastin for 24 hours. n=3. **k** *GPX4* and *SLC7A11* gene mRNA levels were measured by RT-PCR in H460 cells treated with 5  $\mu$ M erastin for 24 hours. n=3. **l** Cystine uptake levels measured in control (sgCon) and SLC7A11-knockout (sgSLC) cells at indicated time points. n=3. **m** SLC7A11-overexpressed 786-O or H1299 cells were treated with or without 10  $\mu$ M erastin for 24 hours. Protein levels were evaluated by Western blotting in indicated cells. **n** *GPX4* and *SLC7A11* gene mRNA levels were measured by RT-PCR in 786-O cells cultured in media with indicated concentration of cystine for 20 hours. n=3. **o** *GPX4* and *SLC7A11* gene mRNA levels were measured by RT-PCR in 786-O cells treated with 5  $\mu$ M erastin for 20 hours. n=3. For all panels, error bars are mean  $\pm$  SD. n indicates biologically independent repeats. *P* value was determined by two-tailed unpaired Student's t-test. For panel **l**, *p* value was determined by two-way ANOVA test. Source data are provided as a Source Data file.

# Supplementary Figure 2

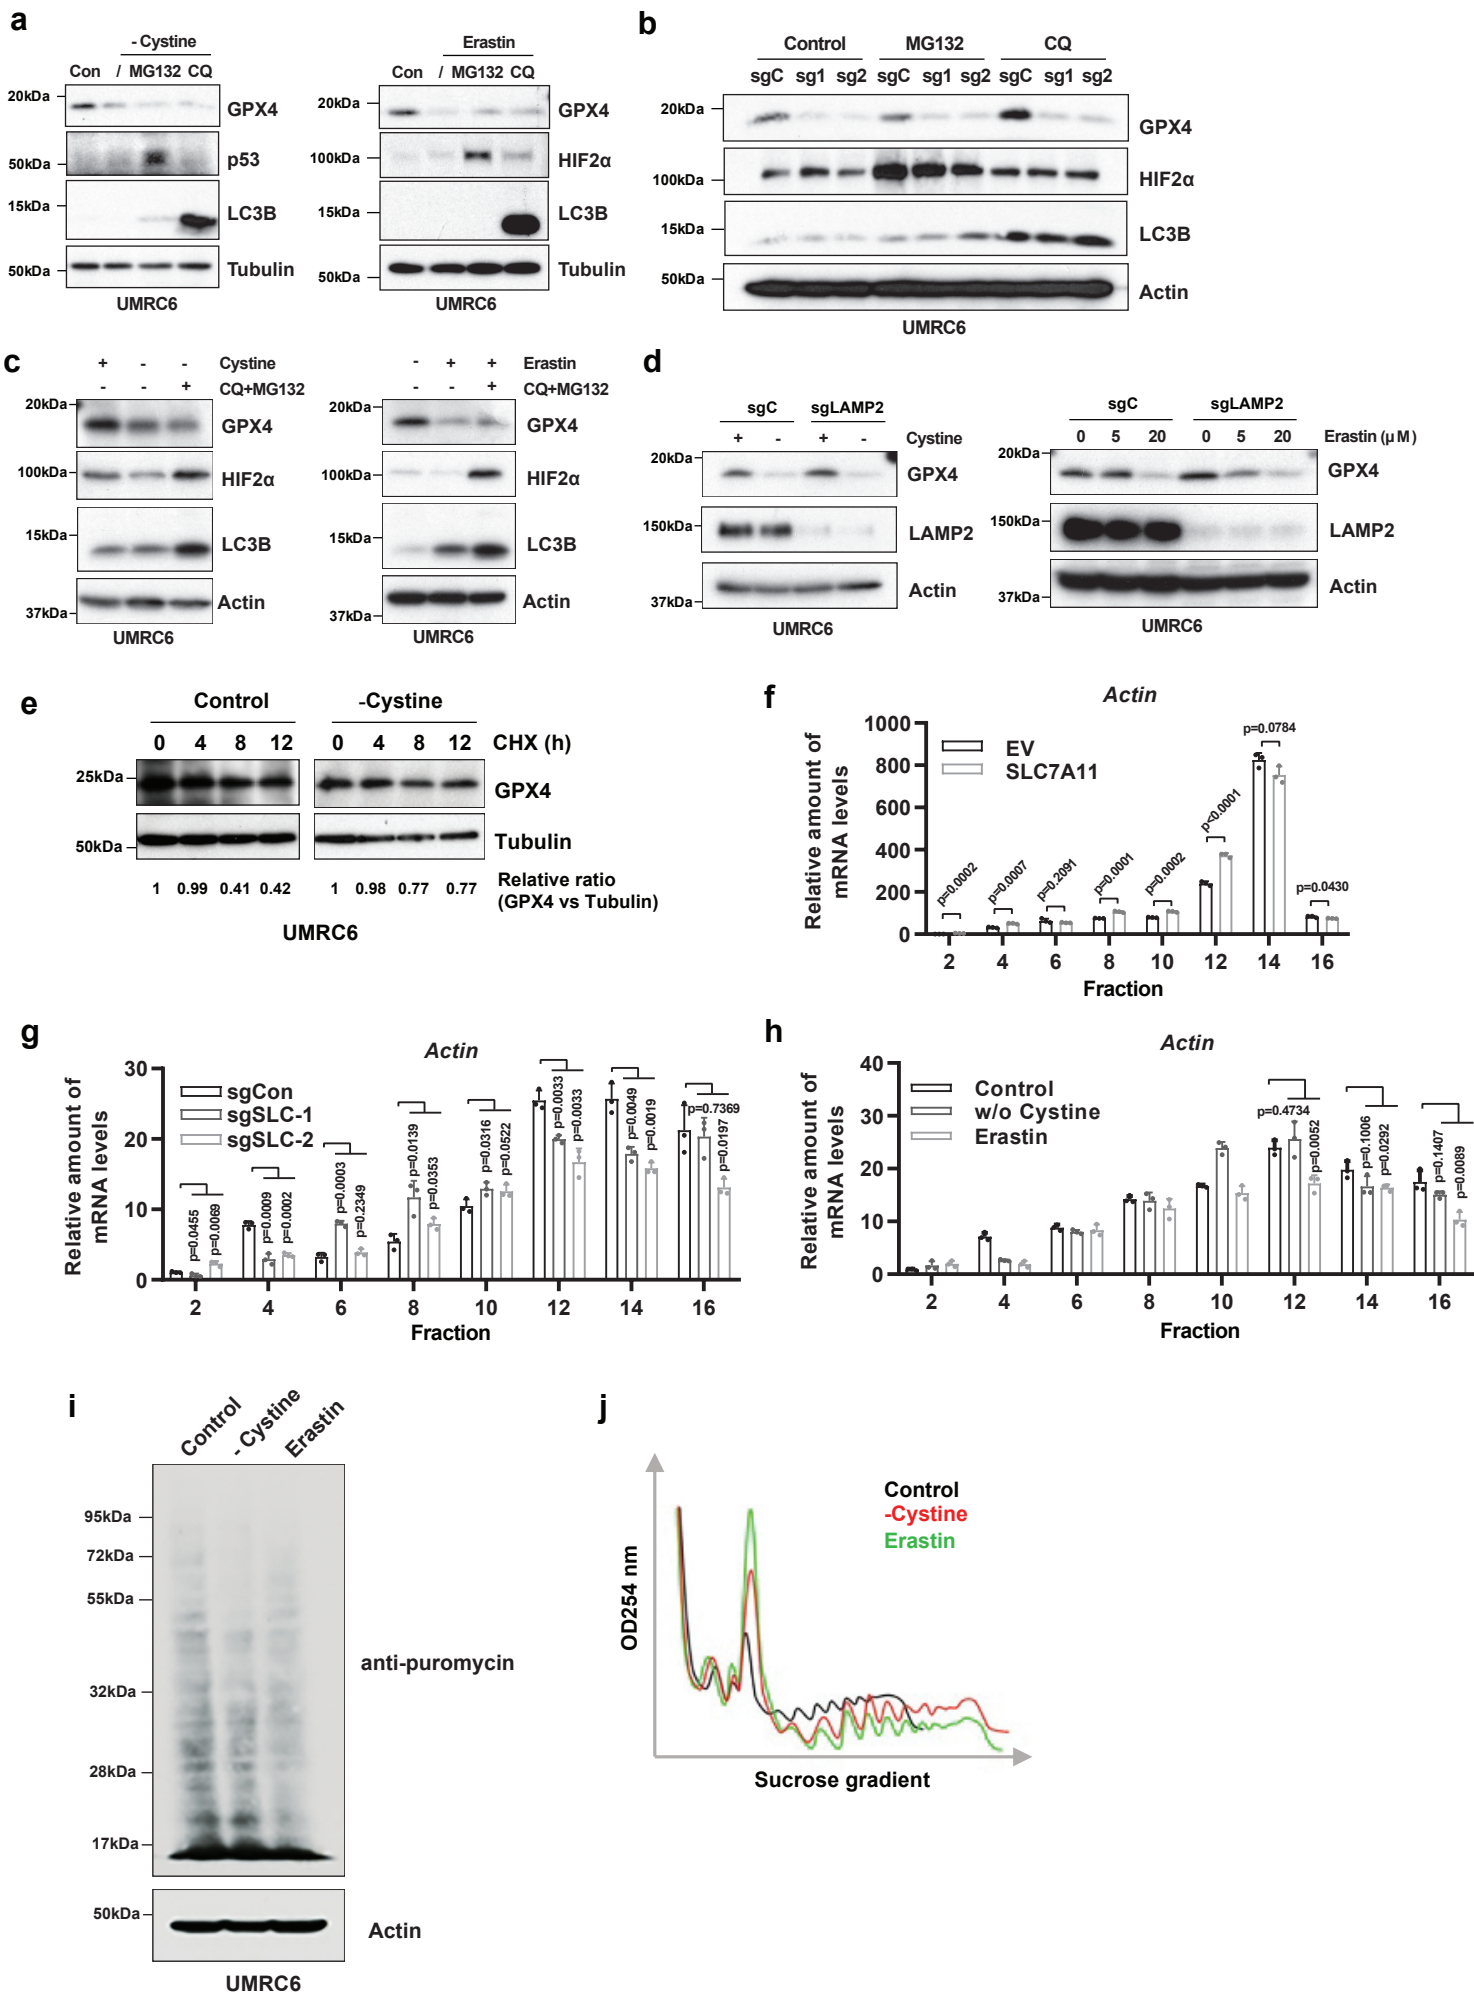

**Supplementary Figure 2. SLC7A11-mediated cystine uptake regulates GPX4 independent of proteasome and/or autophagy-mediated protein degradation.**

**a** UMRC6 cells were treated in cystine-free or 10  $\mu$ M erastin-contained media with or without 10  $\mu$ M MG132 or 50  $\mu$ M Chloroquine (CQ) for 24 hours followed by Western blotting analysis. **b** Western blotting analysis of control (sgC) and *SLC7A11*-KO (sg1 and sg2) UMRC6 cells cultured in media with or without 10  $\mu$ M MG132 or 50  $\mu$ M Chloroquine (CQ) for 16 hours. **c** UMRC6 cells were cultured in cystine-free or 10  $\mu$ M erastin-contained media with or without 5  $\mu$ M MG132 and 25  $\mu$ M Chloroquine (CQ) for 16 hours followed by Western blotting analysis. **d** UMRC6 control (sgC) and LAMP2-knockout (sgLAMP2) cells were cultured in cystine-free media or treated with indicated concentrations ( $\mu$ M) of erastin for 24 hours followed by Western blotting analysis. **e** UMRC6 cells cultured in media with or without cystine for 24 hours followed by adding 50  $\mu$ g/ml cycloheximide (CHX) to each dish. Cells were collected at indicated time points and protein levels were analyzed by Western blotting. **f** 786-EV and -SLC cell lines were subjected to polyribosome fractionation followed by RT-PCR to analyze *ACTB* (Actin) mRNA distribution profiles during protein translation. n=3. **g** UMRC6-sgCon, -sgSLC-1 and -sgSLC-2 cells were subjected to polyribosome fractionation followed by RT-PCR to analyze *ACTB* (Actin) mRNA distribution profiles during protein translation. n=3. **h** UMRC6 cells were treated with control media, cystine-free media or erastin (10 $\mu$ M) for 24 hours followed by polyribosome fractionation and RT-PCR to analyze *ACTB* (Actin) mRNA distribution profiles during protein translation. n=3. **i** Protein synthesis assay for UMRC6 cell treated cystine-free media for 22 hours or 10  $\mu$ M erastin for 24 hours. **j** Absorbance (A<sub>254</sub> nm) of sucrose density gradient fractionated ribosomes from UMRC6 cells treated as described in **i**. For all panels, error bars are mean  $\pm$  SD. n indicates biologically independent repeats. *P* value was determined by two-tailed unpaired Student's t-test. Source data are provided as a Source Data file.

# Supplementary Figure 3

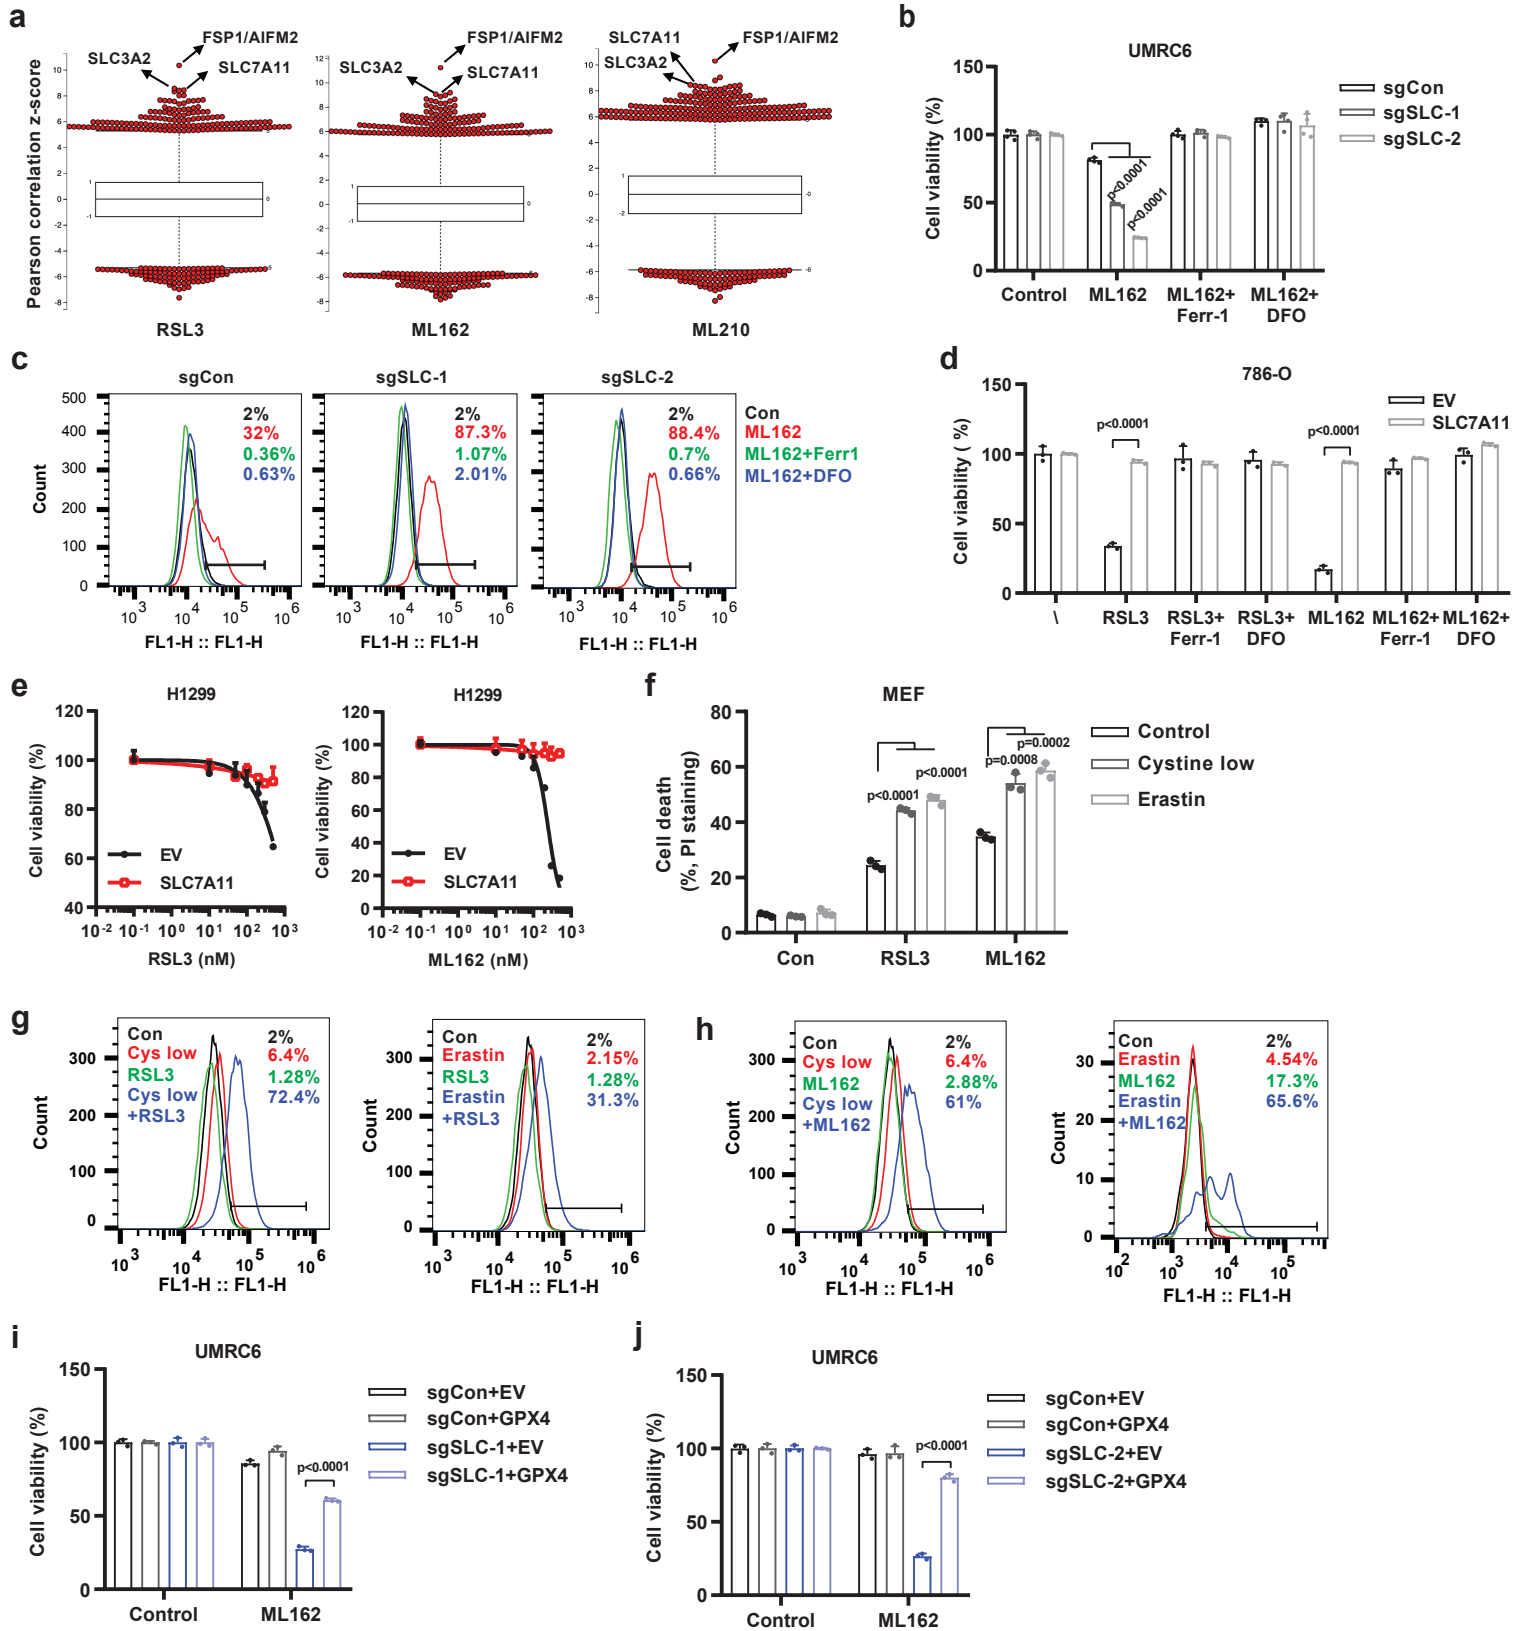

**Supplementary Figure 3. SLC7A11 modulates ferroptosis sensitivity to class 2 FINs partly through regulating GPX4 levels.**

**a** Correlation between the sensitivity to indicated drugs and gene expression in 860 cancer cell lines (<https://portals.broadinstitute.org/ctrp>). **b** Cell viability was determined for control (sgCon) and SLC7A11-knockout (sgSLC-1 and sgSLC-2) UMRC6 cells treated with 500 nM ML162 combined with or without 5  $\mu$ M Ferrostatin-1 (Ferr-1) or 100  $\mu$ M deferoxamine (DFO) for 10 hours. *n*=4. **c** UMRC6 cells were treated with 600 nM ML162 combined with or without 5  $\mu$ M Ferrostatin-1 (Ferr-1) or 100  $\mu$ M deferoxamine (DFO) for 6 hours. Then lipid peroxidation was assessed using BODIPY<sup>TM</sup> 581/591 C11 staining followed by FACS analysis. **d** 786-O-EV and -SLC7A11 cells treated with 400nM RSL3 or ML162 with or without 5  $\mu$ M Ferrostatin-1 (Ferr-1) or 100  $\mu$ M deferoxamine (DFO) for 9 hours followed by cell viability analysis. *n*=3. **e** Empty vector- (EV) and SLC7A11-overexpressing (SLC7A11) H1299 cells were treated with RSL3 or ML162 at indicated concentrations for 9 hours followed by cell viability analysis. *n*=3. **f** MEFs were cultured in control, cystine low (1  $\mu$ M) or erastin (0.5  $\mu$ M) with or without RSL3 (400 nM) or ML162 (400 nM) for 10 hours followed by PI staining and FACS analysis. *n*=3. **g** Left, UMRC6 cells were cultured in cystine-low (1  $\mu$ M) media combined with or without 300 nM RSL3 for 6 hours. Right, UMRC6 cells were treated with Erastin (5  $\mu$ M) combined with or without 300 nM RSL3 for 6 hours. Then lipid peroxidation was assessed using BODIPY<sup>TM</sup> 581/591 C11 staining followed by FACS analysis. **h** Left, UMRC6 cells were cultured in cystine-low (1  $\mu$ M) media combined with or without 300 nM ML162 for 6 hours. Right, UMRC6 cells were treated with Erastin (5  $\mu$ M) combined with or without 300 nM ML162 for 6 hours. Then lipid peroxidation was assessed using BODIPY<sup>TM</sup> 581/591 C11 staining followed by FACS analysis. **i-j** Cell viability of indicated cell treated with 400 nM ML162 for 8 hours. *n*=3. For all panels, error bars are mean  $\pm$  SD. *n* indicates biologically independent repeats. *P* value was determined by two-tailed unpaired Student's *t*-test. Source data are provided as a Source Data file.

# Supplementary Figure 4

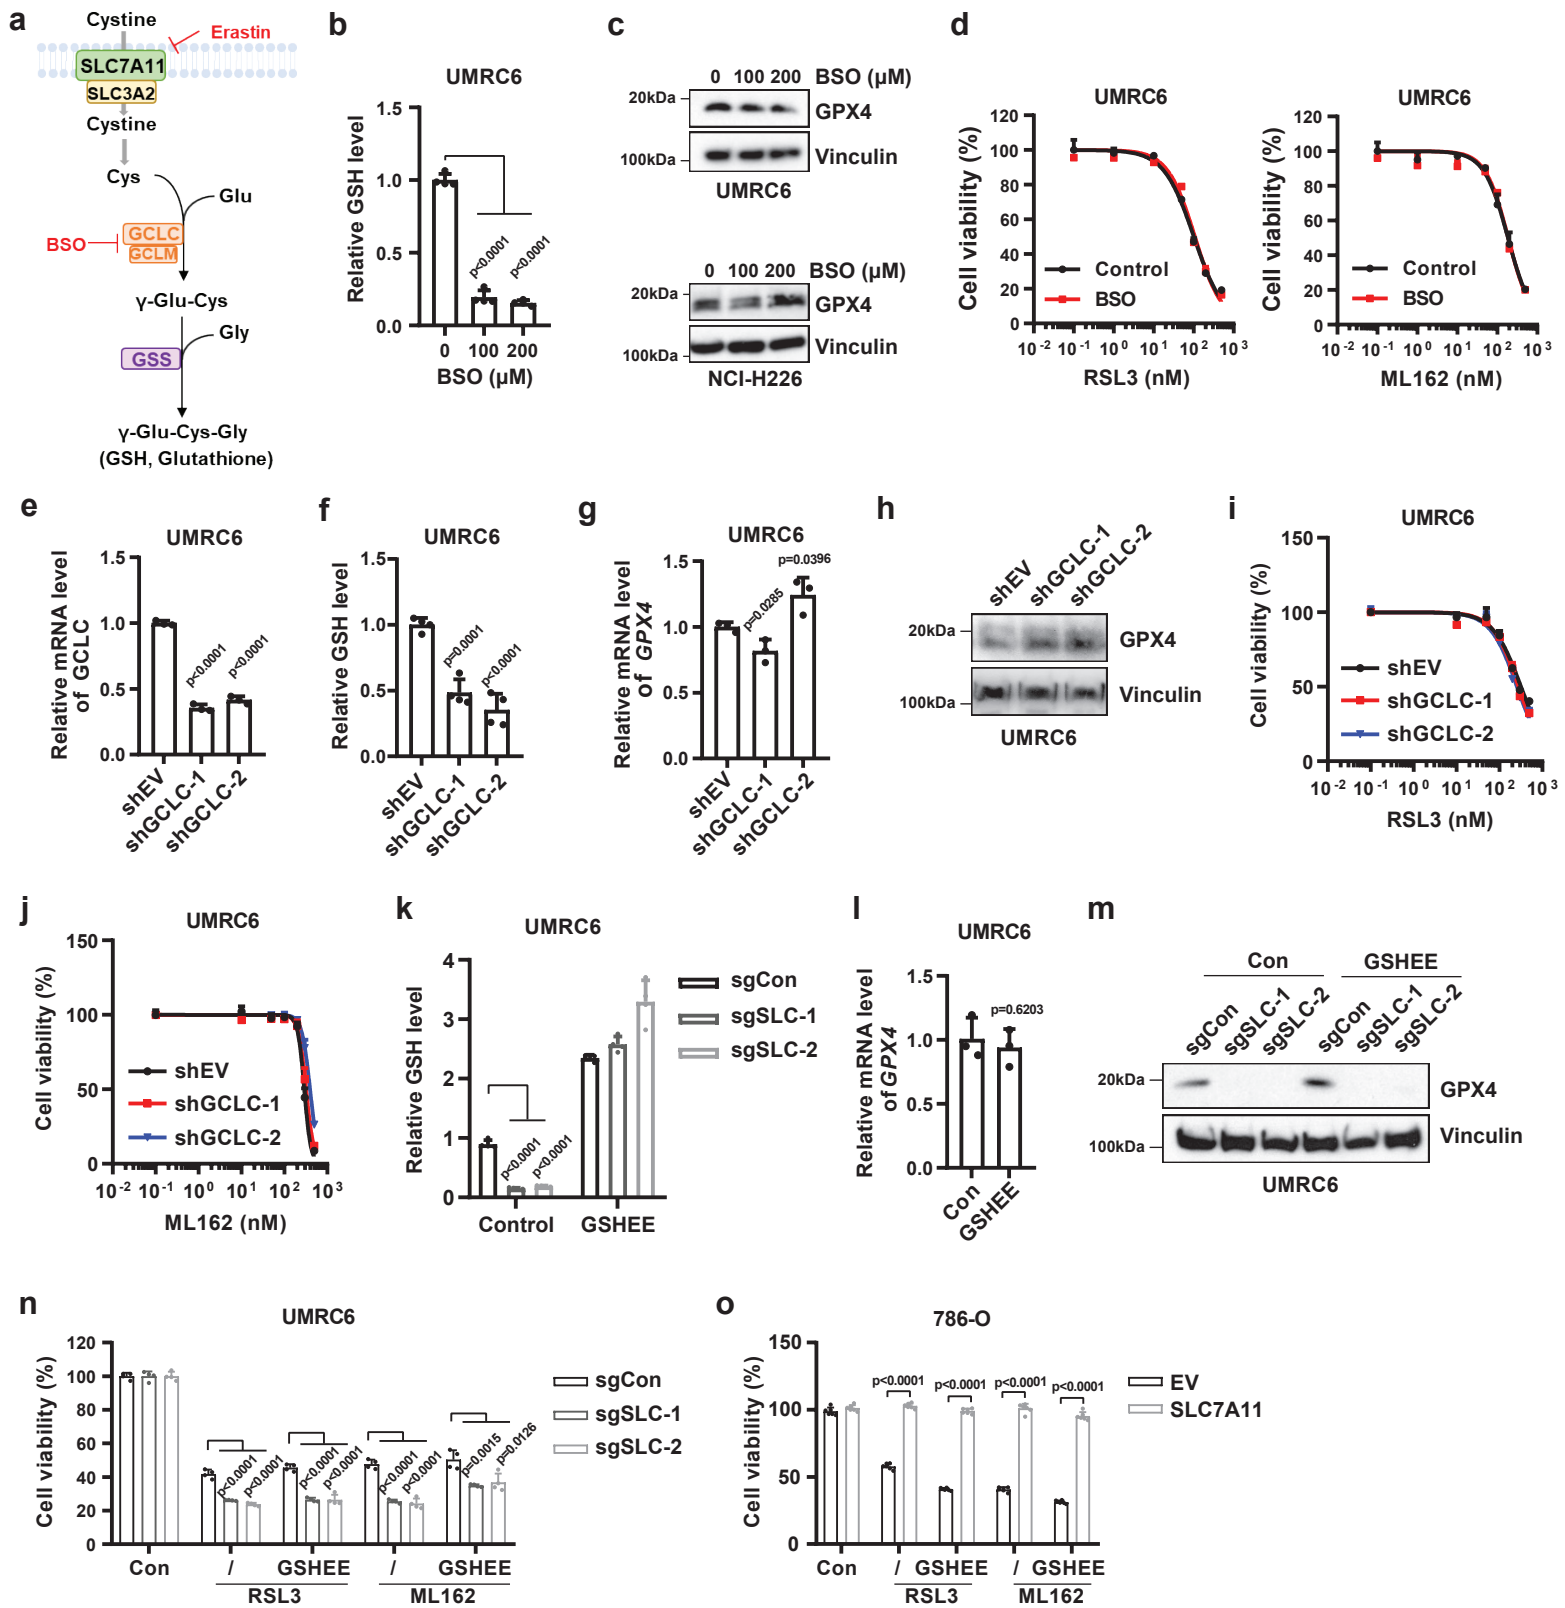



**Supplementary Figure 4. GSH depletion does not regulate GPX4 protein levels or ferroptosis sensitivity to class 2 FINs.**

**a** Diagram showing glutathione synthesis pathway. BSO, buthionine sulfoximine. **b** Bar graph showing intracellular GSH levels in UMRC6 cells treated with BSO at indicated concentrations for 24 hours. n=4. **c** Western blotting analysis of indicated cells treated with BSO at indicated concentrations for 24 hours. **d** Cell viability measured in UMRC6 cells pretreated with 100  $\mu$ M BSO for 24 hours followed by treatment with different concentration of RSL3 or ML162 for 10 hours. **e** RT-PCR analysis of *GCLC* mRNA levels in the indicated cell lines. n=3. **f** Bar graph showing intracellular GSH levels in the indicated cells. n=4. **g** RT-PCR analysis of *GPX4* mRNA levels in the indicated cell lines. n=3. **h** GPX4 protein expression level analyzed by Western blotting in indicated cells. **i** Cell viability of indicated cells treated with RSL3 at different concentrations for 8 hours. **j** Cell viability of indicated cells treated with ML162 at different concentrations for 10 hours. **k** Bar graph showing intracellular GSH levels in indicated cells treated with 5  $\mu$ M Glutathione ethylester (GSHEE) for 24 hours. n=4. **l** RT-PCR analysis of *GPX4* mRNA levels in UMRC6 cells treated with or without 5  $\mu$ M Glutathione ethylester (GSHEE) for 24 hours. n=3. **m** GPX4 protein expression levels analyzed by Western blotting in indicated cells treated with or without 5  $\mu$ M Glutathione ethylester (GSHEE) for 24 hours. **n** Cell viability of indicated cells treated with 1  $\mu$ M RSL3 or ML162 combined with or without 5  $\mu$ M GSHEE for 8 hours. n=4. **o** Cell viability of indicated cells treated with 0.5  $\mu$ M RSL3 or ML162 combined with or without 5  $\mu$ M GSHEE for 8 hours. n=6. For all panels, error bars are mean  $\pm$  SD. n indicates biologically independent repeats. *P* value was determined by two-tailed unpaired Student's t-test. Source data are provided as a Source Data file.

# Supplementary Figure 5

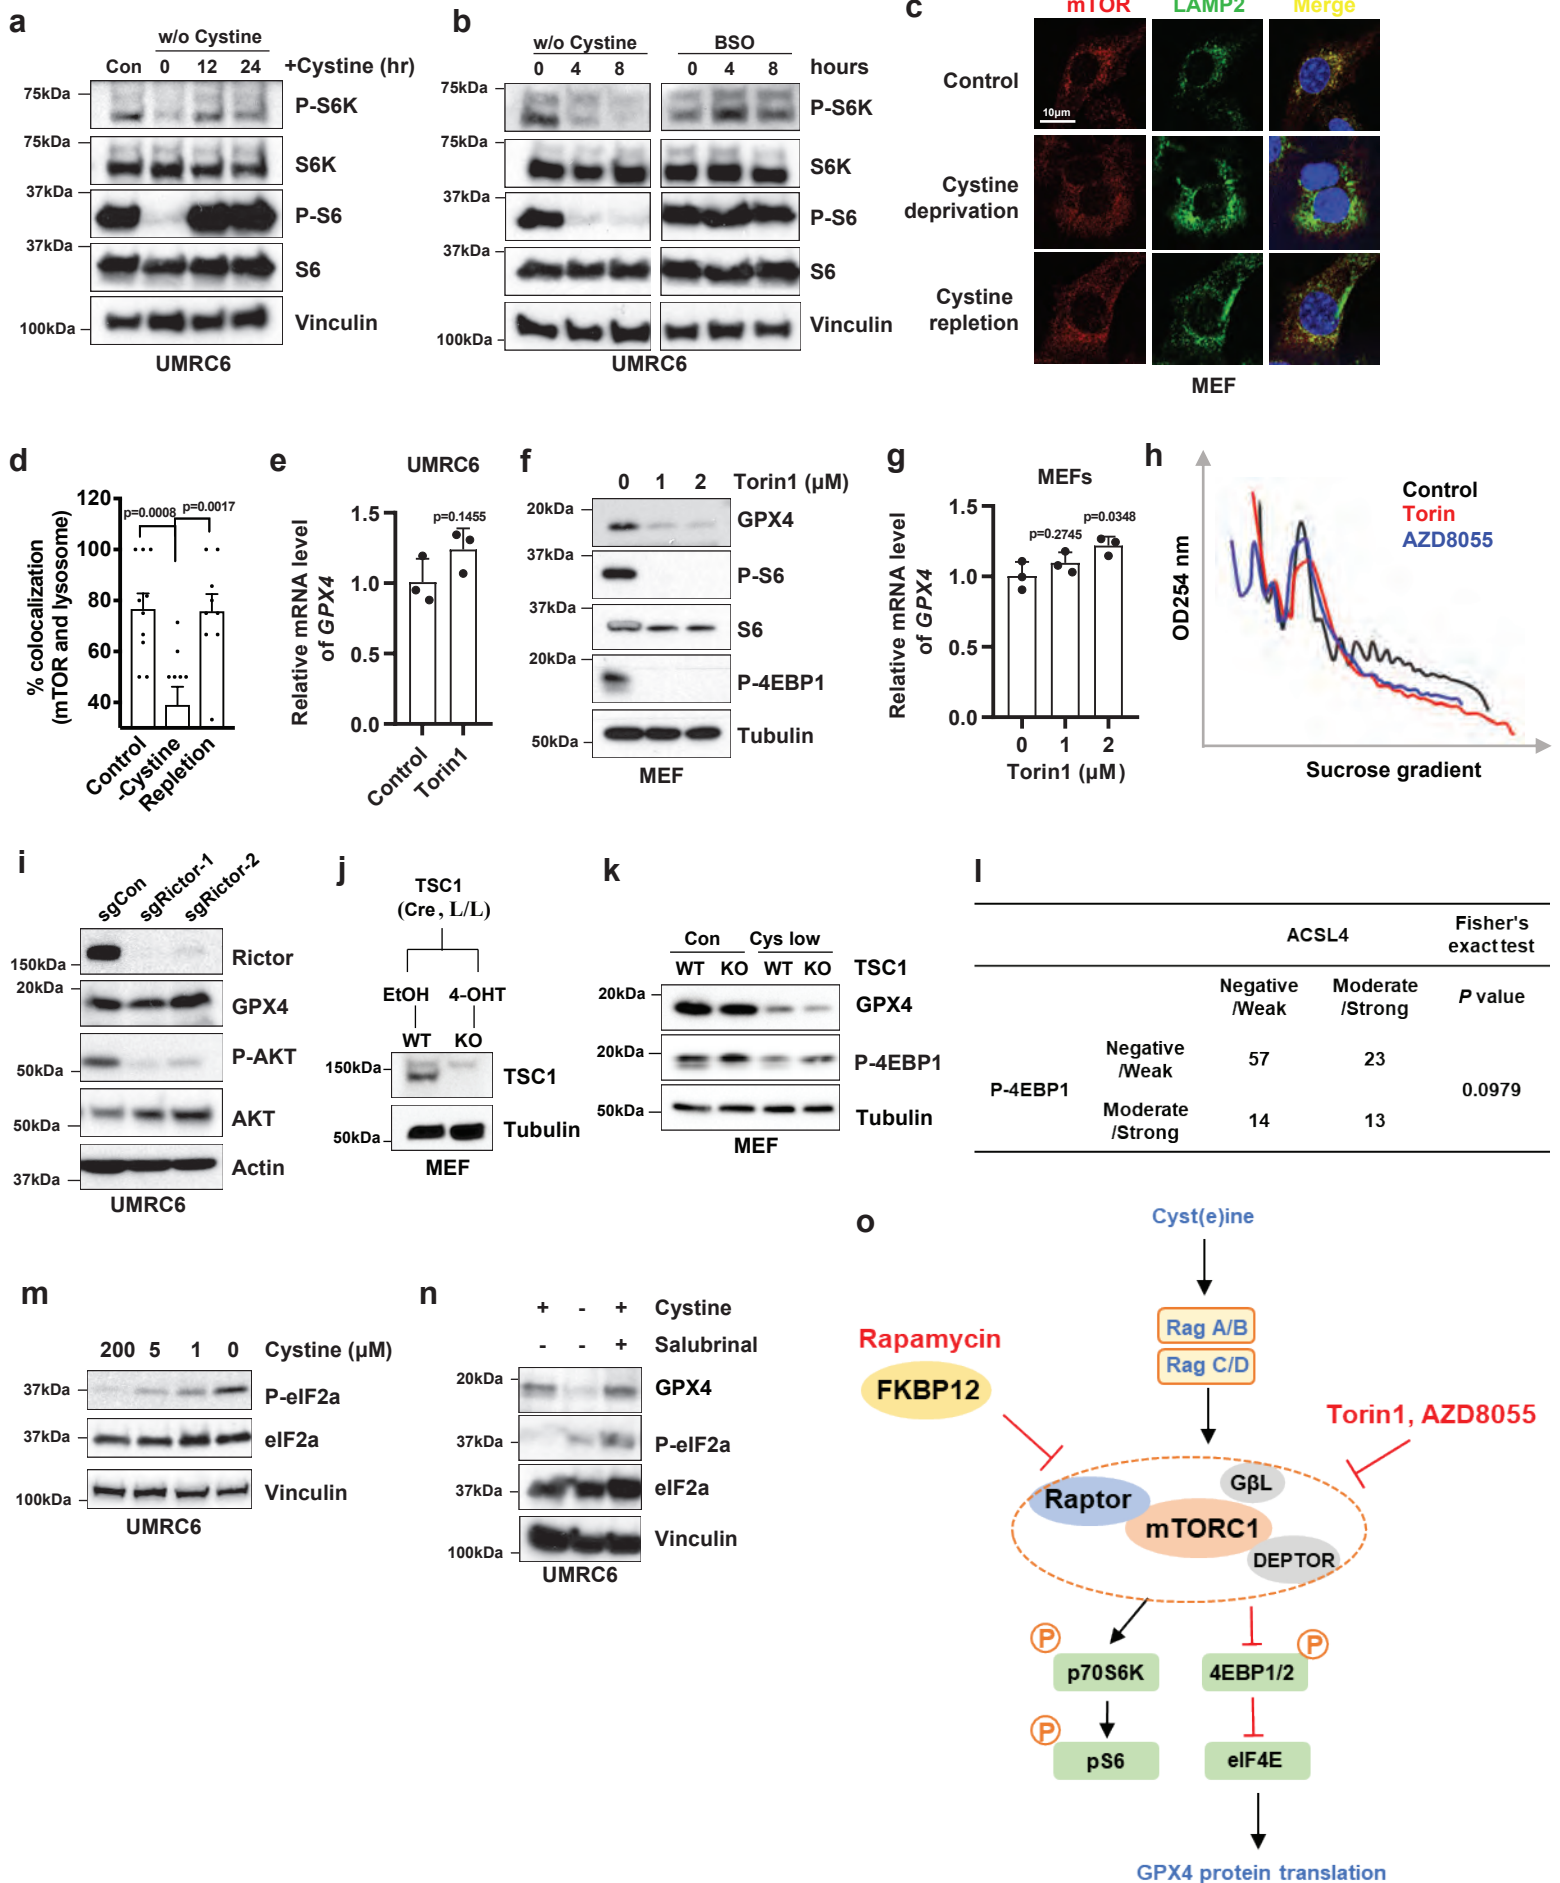

**Supplementary Figure 5. Cyst(e)ine promotes GPX4 protein synthesis partly through mTORC1-4E-BP signaling.**

**a** UMRC6 cells were cultured in cystine-free media for 24 hours. Then 200  $\mu$ M cystine was added back to the media for indicated time followed by Western blotting. **b** UMRC6 cells were cultured in cystine-free media or 100  $\mu$ M BSO-contained media for indicated time followed by Western blotting. **c** MEFs were cultured in cystine-free media for 8 hours (Cystine deprivation). Then 200  $\mu$ M cystine was added back to the media for 12 hours (Cystine repletion) followed by immunofluorescence imaging. **d** Quantification of percentage for cells with colocalized mTOR and LAMP2 in MEFs treated as described in **c**.  $n=9$  randomly observed areas per slides of treated sample. Error bars are mean  $\pm$  SE.  $P$  value was determined by two-tailed unpaired Student's t-test. **e** RT-PCR analysis of *GPX4* mRNA level in UMRC6 cells treated with or without 200 nM Torin1 for 24 hours.  $n=3$ . **f** MEFs were treated with Torin1 at indicated concentrations for 24 hours followed by Western blotting analysis. **g** RT-PCR analysis for *GPX4* mRNA levels in MEFs treated with Torin1 at indicated concentrations for 24 hours.  $n=3$ . **h** Absorbance ( $A_{254}$  nm) of sucrose density gradient fractionated ribosomes from control, Torin1 (1  $\mu$ M)- or AZD8055 (1  $\mu$ M)-treated cell extracts. **i** Protein levels in UMRC6 control (sgC) and Rictor knockout cells (sgRictor-1 and sgRictor-2) were analyzed by Western blotting. **j** TSC1-knockout MEFs were generated as shown in the workflow and verified using Western blotting. **k** Cells were cultured in control or cystine low (5  $\mu$ M cystine) media for 16 hours followed by Western blotting analysis. **l** The expression analysis of ACSL4 and p-4EBP1 in tissue microarrays. **m** UMRC6 cells were cultured in media with indicated concentrations of cystine for 24 hours followed by Western blotting analysis. **n** UMRC6 cell were cultured in cystine-free media or treated with 10  $\mu$ M salubrinal for 24 hours followed by Western blotting analysis. **o** Diagram of mTORC1/4EBPs pathway regulation on protein translation. For panel e and g, error bars are mean  $\pm$  SD.  $n$  indicates biologically independent repeats.  $P$  value was determined by two-tailed unpaired Student's t-test. Source data are provided as a Source Data file.

# Supplementary Figure 6

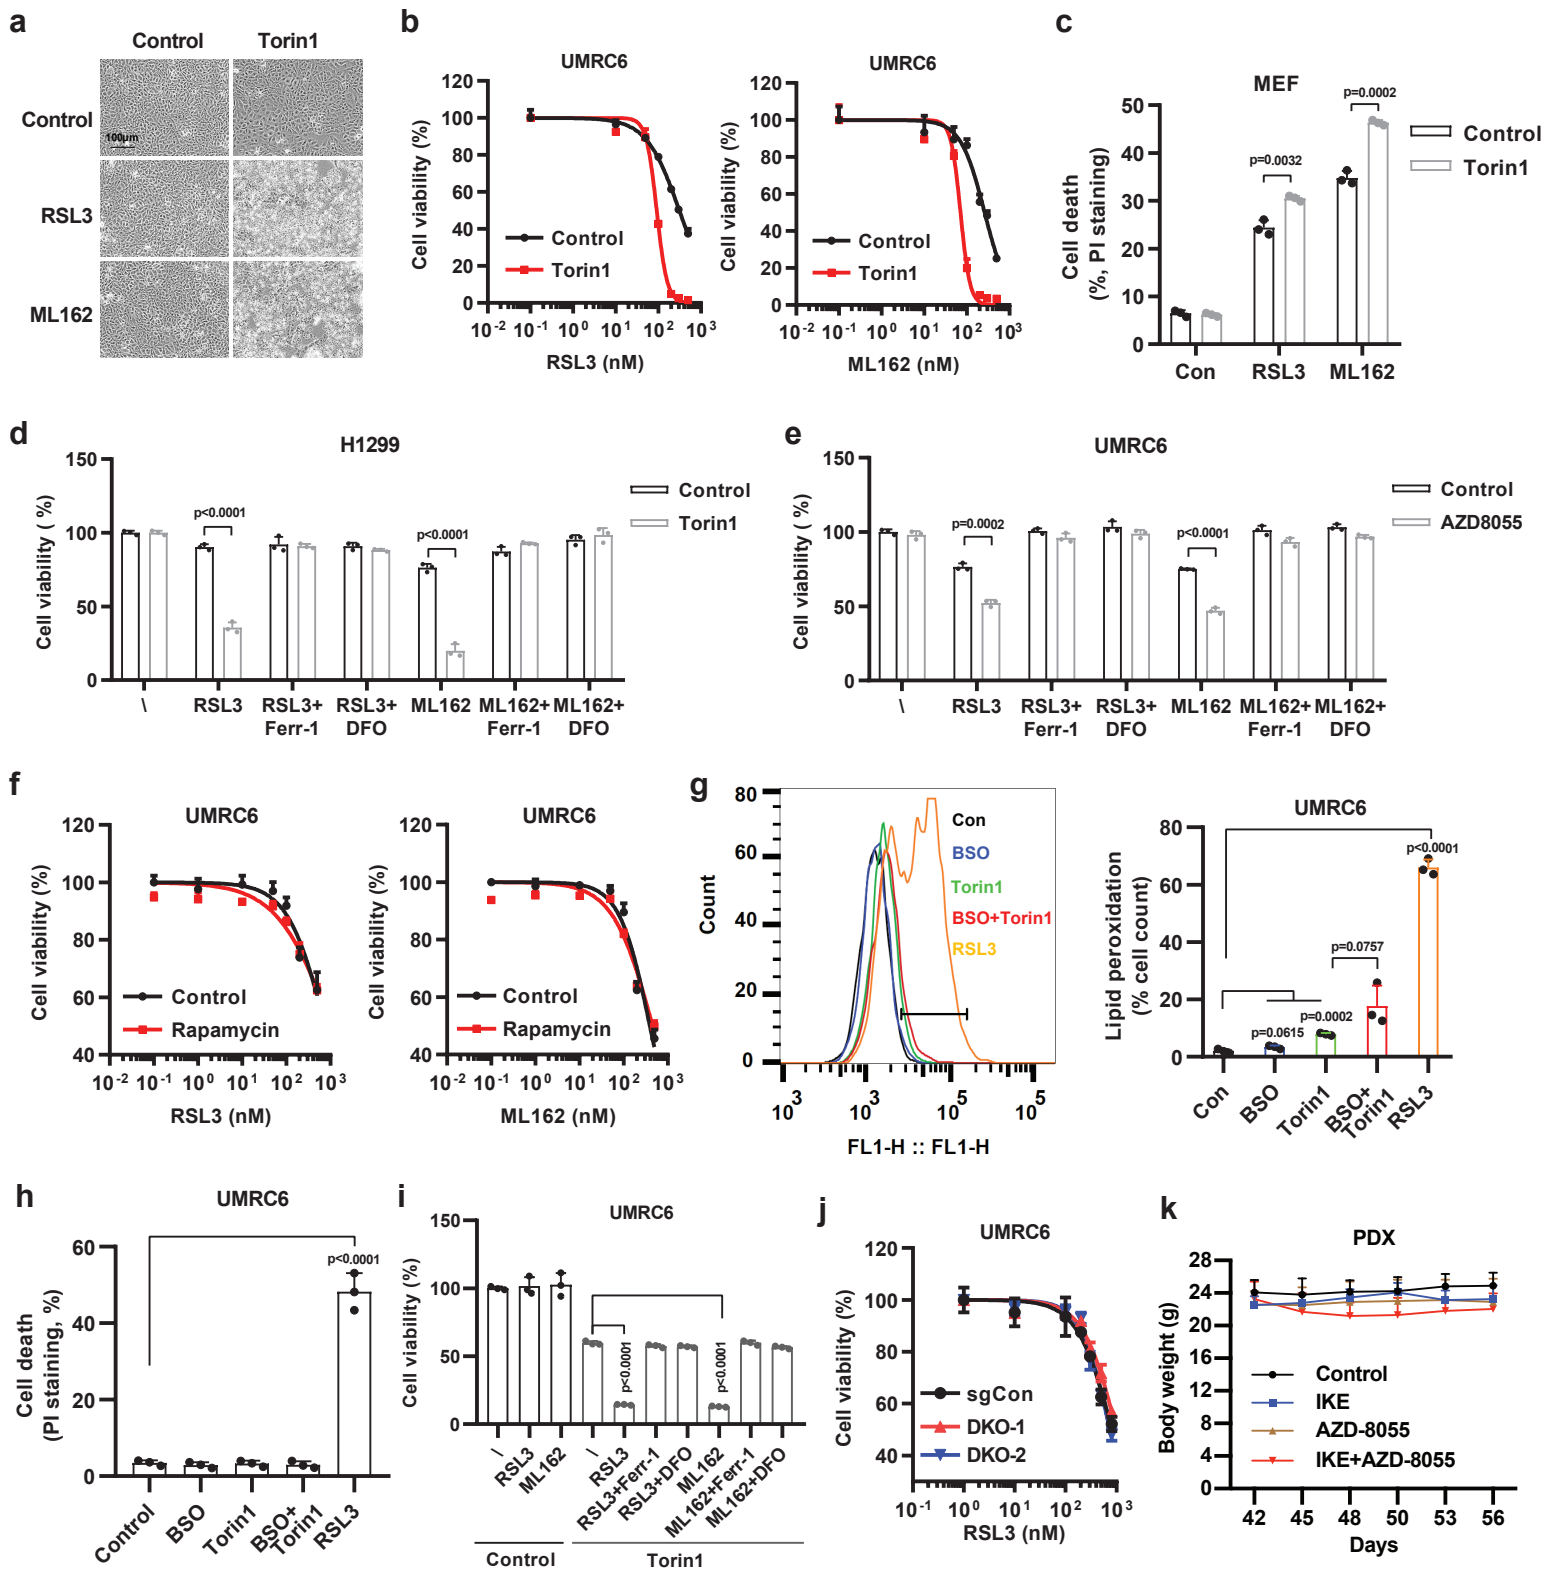

**Supplementary Figure 6. mTORC1 inhibition sensitizes cancer cells or tumors to ferroptosis.**

**a** Representative phase-contrast images of UMRC6 cells treated with 400 nM RSL3 or ML162 in the presence of 1  $\mu$ M Torin1 or not for 7 hours. **b** Cell viability of UMRC6 cells treated with RSL3 or ML162 at indicated concentrations combined with 200 nM Torin1 or not for 10 hours. **c** MEFs were cultured in media with 500 nM RSL3 or ML162 in the presence of 1  $\mu$ M Torin1 or not for 16 hours. Then cell death was determined by PI staining followed by FACS analysis.  $n=3$ . **d** H1299 cells were treated with 300 nM RSL3 or ML162 combined with 1  $\mu$ M Torin1, and/or 5  $\mu$ M Ferr-1 or 100  $\mu$ M DFO for 8 hours followed by cell viability analysis.  $n=3$ . **e** UMRC6 cells were treated with 400 nM RSL3 or ML162 combined with 1  $\mu$ M AZD8055, and/or 5  $\mu$ M Ferr-1 or 100  $\mu$ M DFO for 8 hours followed by cell viability analysis.  $n=3$ . **f** Cell viability of UMRC6 cells treated with RSL3 or ML162 at indicated concentrations combined with 200 nM rapamycin or not for 10 hours. **g** UMRC6 cells were treated with BSO (100  $\mu$ M), Torin1 (1  $\mu$ M) or BSO and Torin1 together for 24 hours or RSL3 (0.5  $\mu$ M) for 6 hours followed by lipid peroxidation analysis using Bodipy 581/591 C11. Bar graph showing quantitative analysis of lipid peroxidation levels.  $n=3$ . **h** UMRC6 cells were treated as described in **g** followed by PI staining for cell death analysis.  $n=3$ . **i** UMRC6 cells were pretreated with 1  $\mu$ M Torin1 for 24 hours. Then cells were treated with indicated combinations for 8 hours followed by cell viability analysis. RSL3 and ML162, 400 nM; Ferr-1, 5  $\mu$ M; DFO, 100  $\mu$ M.  $n=3$ . **j** Cell viability of control (sgCon) and 4EBP1/2 double-knockout (DKO-1 and DKO-2) UMRC6 cells treated with RSL3 at indicated concentrations for 10 hours. **k** Body weights of PDX tumor-bearing mice injected daily with 30 mg/kg IKE, or 10mg/kg AZD8055, or both at different time points as shown. For all panels, error bars are mean  $\pm$  SD.  $n$  indicates biologically independent repeats.  $P$  value was determined by two-tailed unpaired Student's  $t$ -test. Source data are provided as a Source Data file.

Supplementary Figure 7

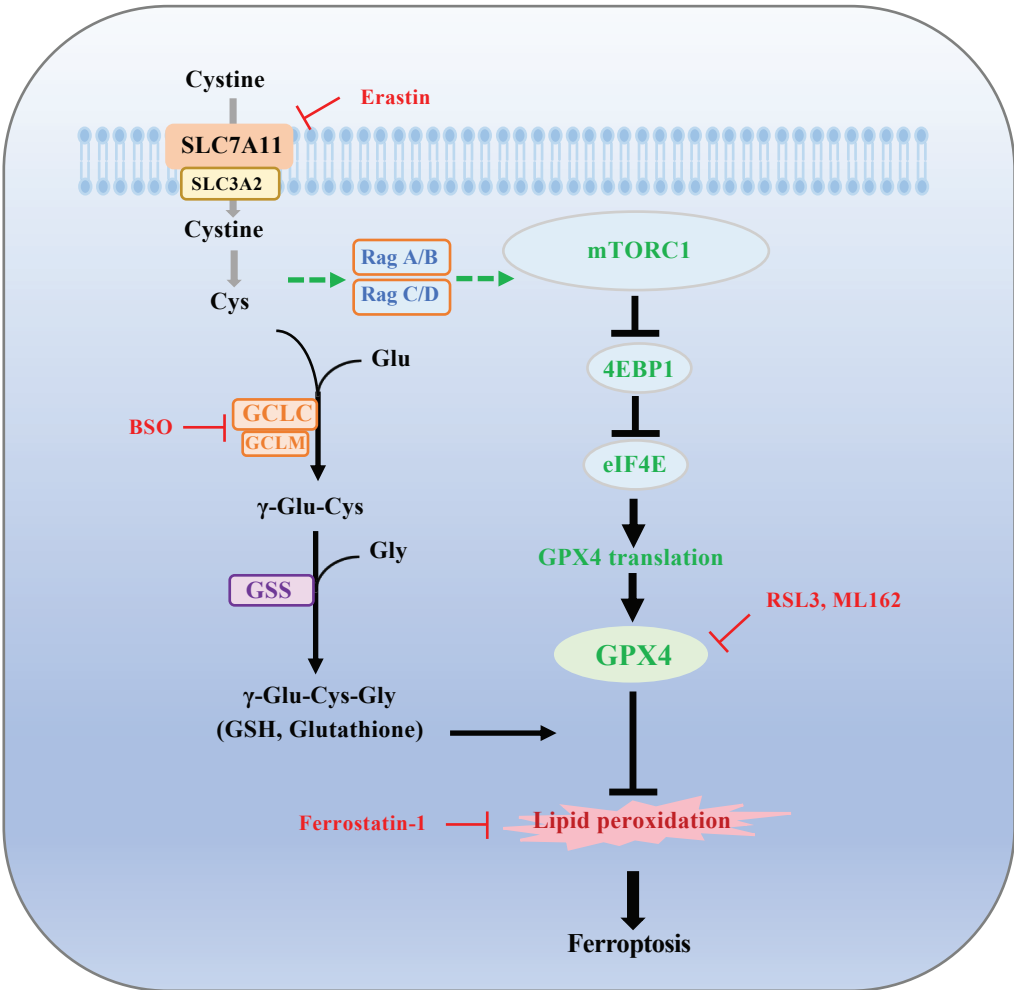

Supplementary Figure 7. The model depicting translational regulation of GPX4 by cyst(e)ine and mTORC1-4E-BP signaling.

**Supplementary Figure 8**

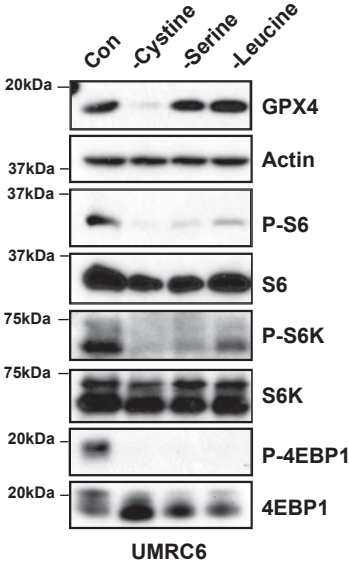

**Supplementary Figure 8. Western blotting showing GPX4 level and mTOR1 signaling upon starvation of different amino acids as indicated for 24 hours in UMRC6 cells.**

**Supplementary Figure 9**

**Gating example for lipid peroxidation analysis**

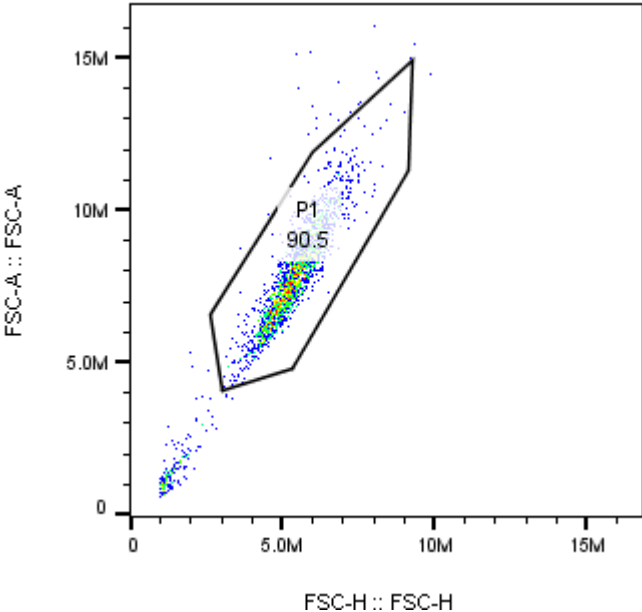

**Gating example for PI staining-mediated cell death analysis**

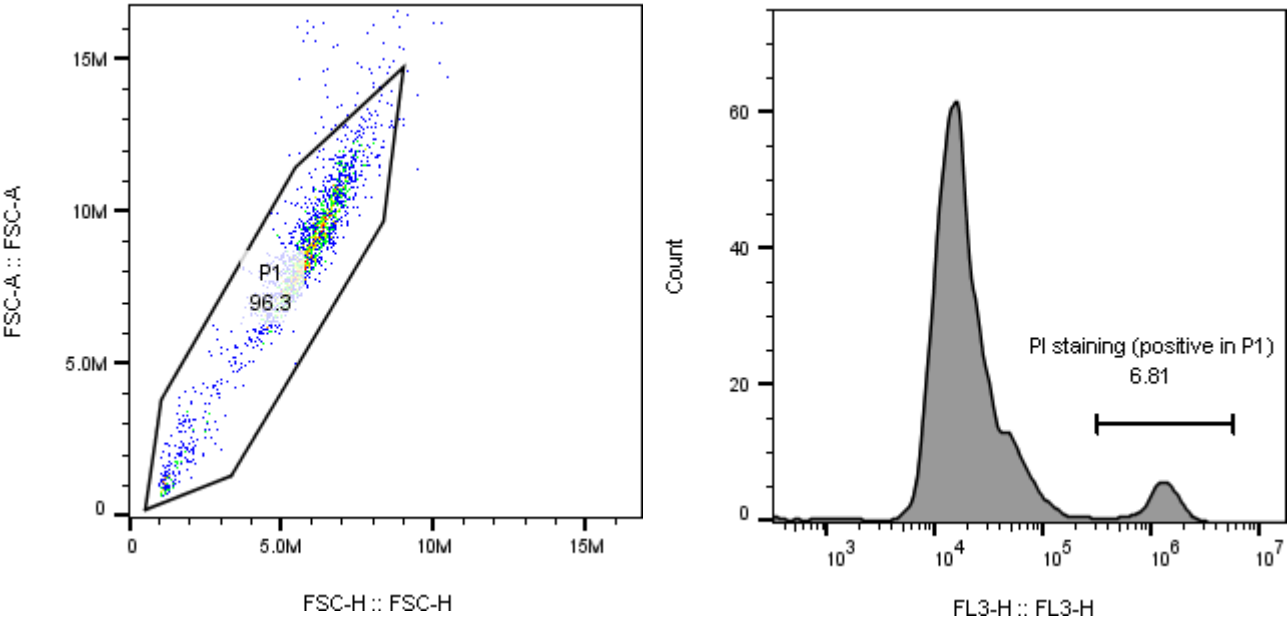

**Supplementary Figure 9. Gating strategies for lipid peroxidation and PI staining analysis through flow cytometry.**



Supplementary Figure 10 Uncropped blots

Fig. 1

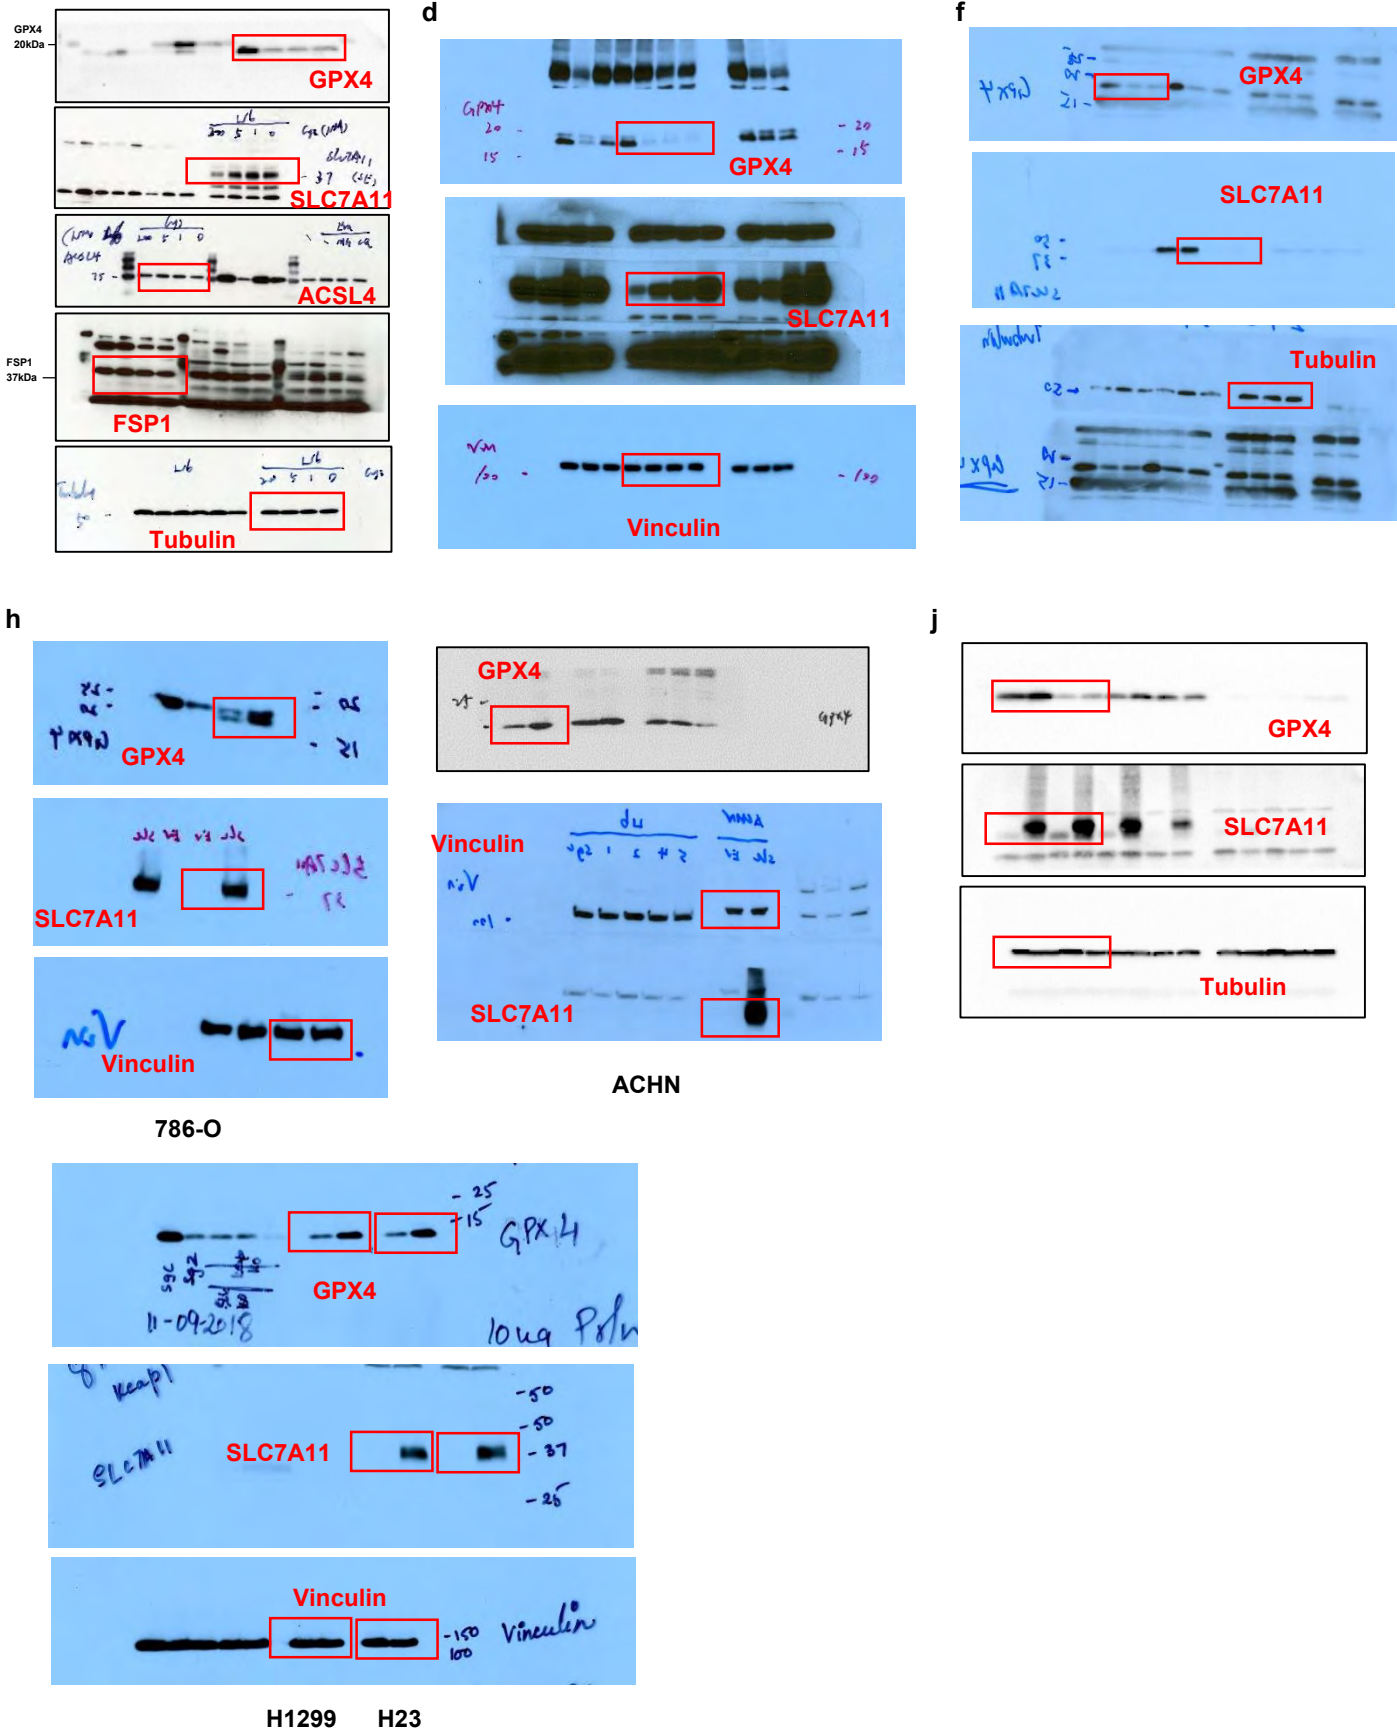

# Supplementary Figure 10 Uncropped blots

Fig. 2

h

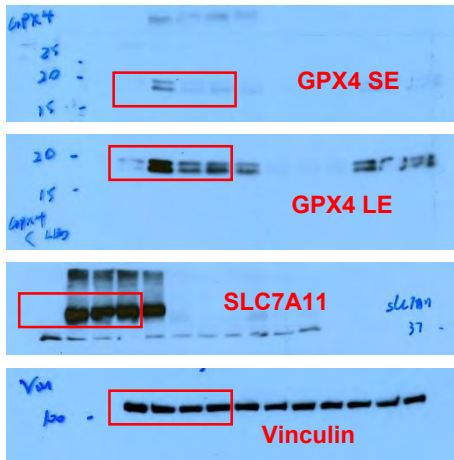

j

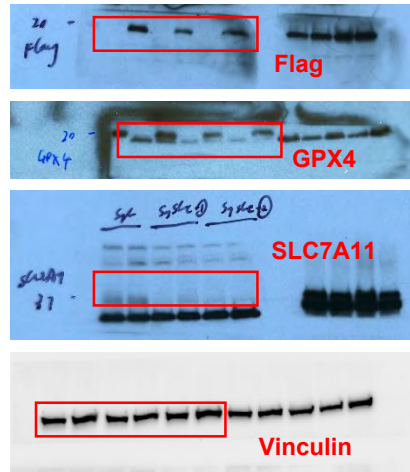

# Supplementary Figure 10 Uncropped blots

Fig. 3

a

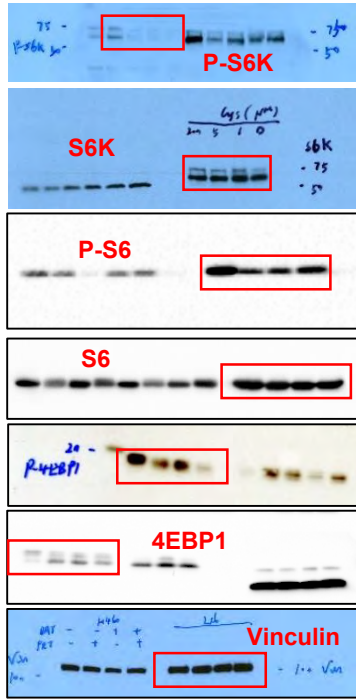

b

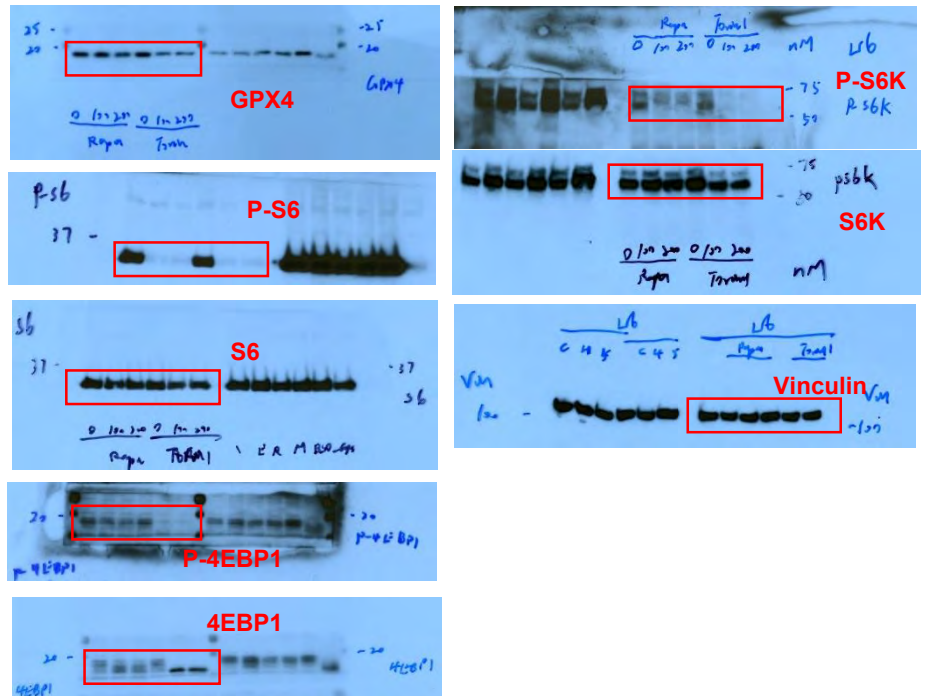

c

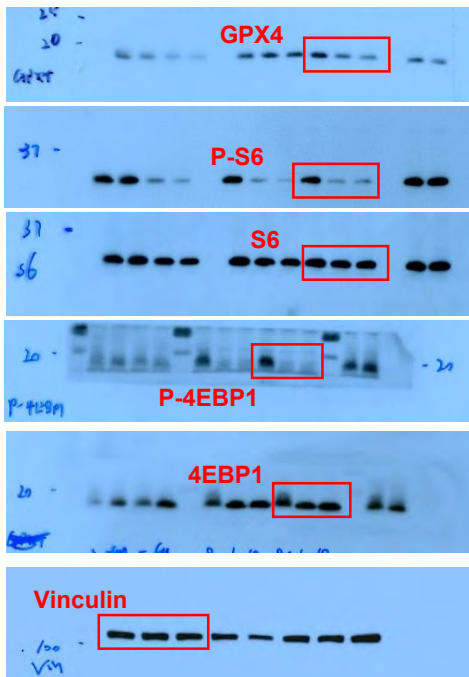

e

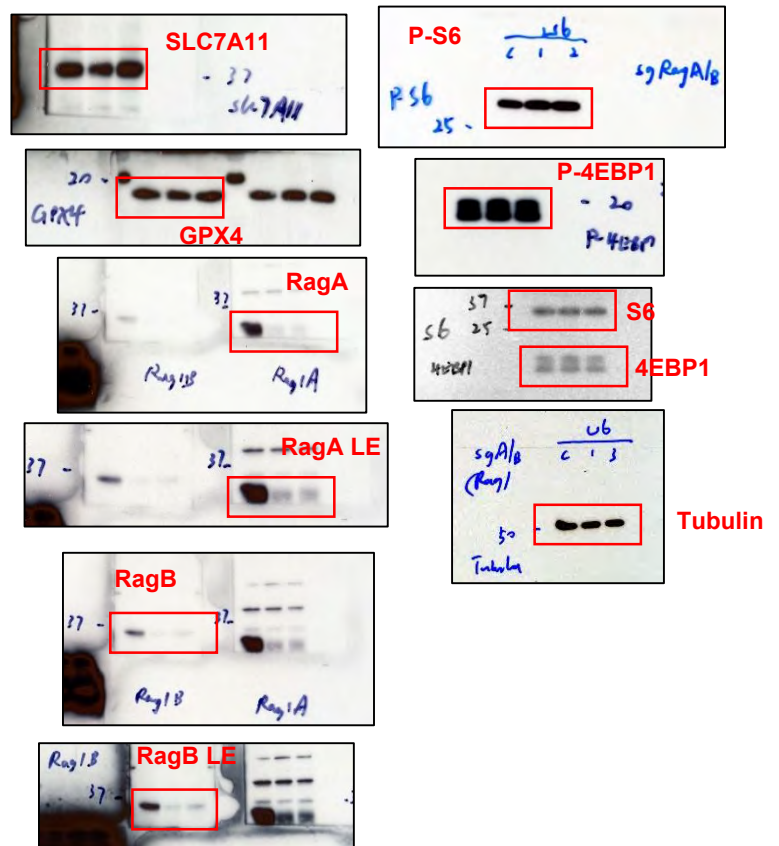

# Supplementary Figure 10 Uncropped blots

Fig. 3 continued

f

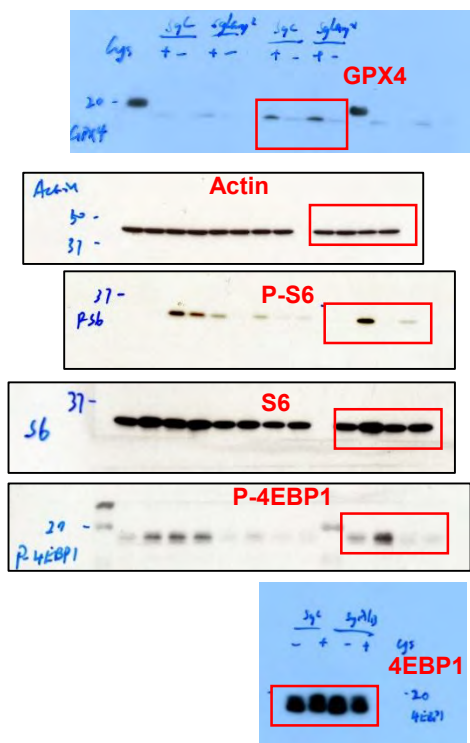

g

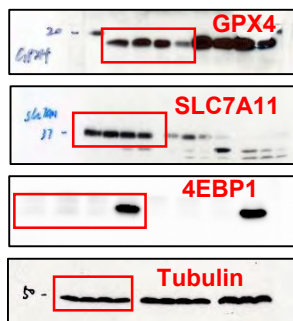

h

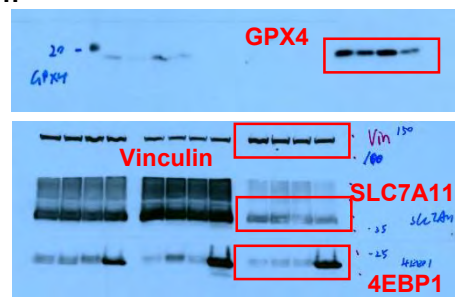

i

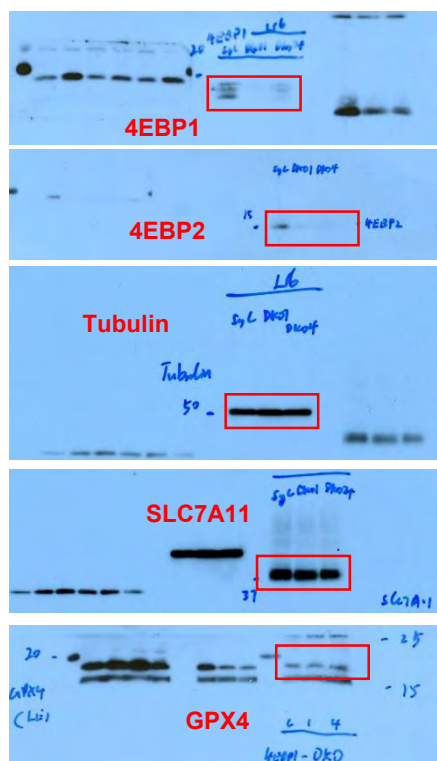

j

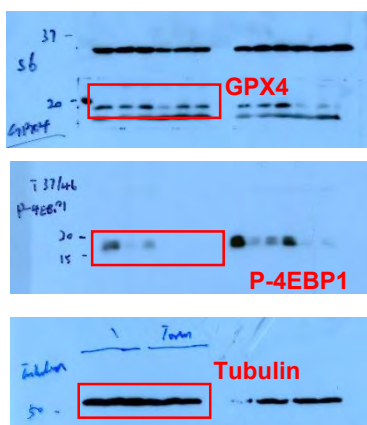

k

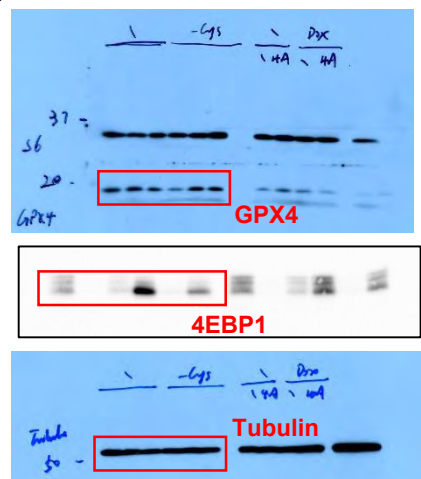

# Supplementary Figure 10 Uncropped blots

Fig. S1

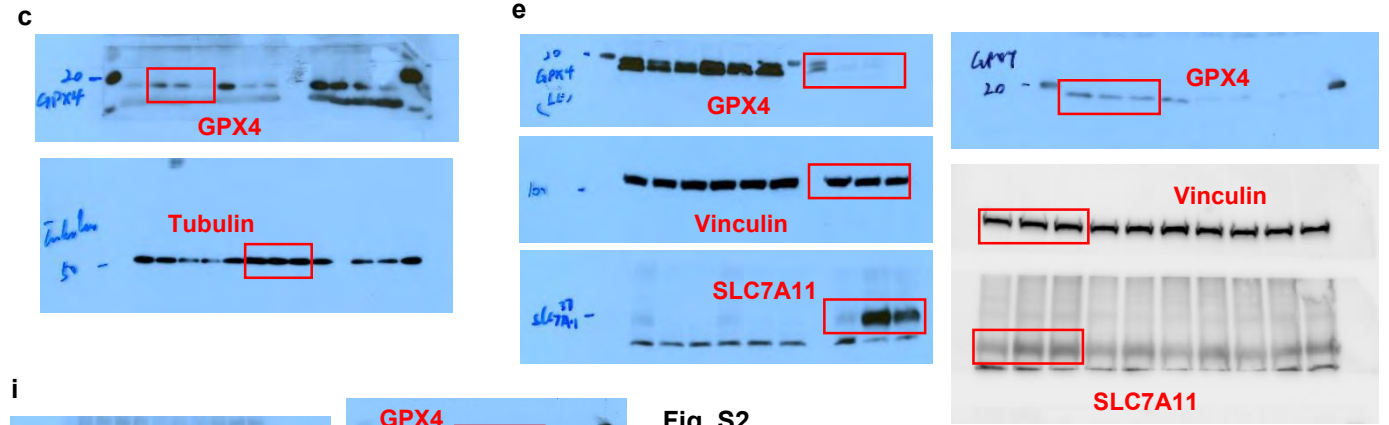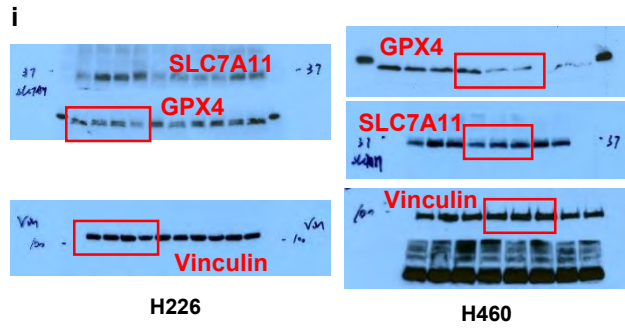

Fig. S2

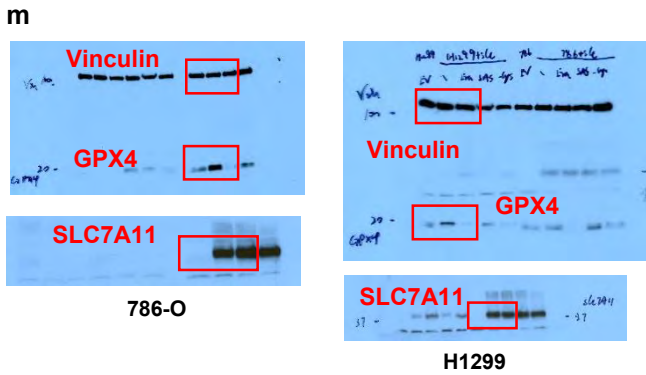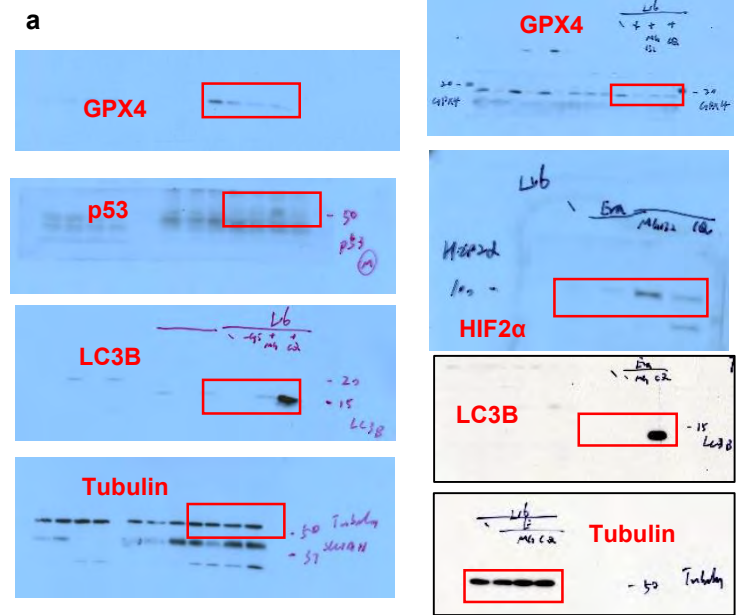

Fig. S2

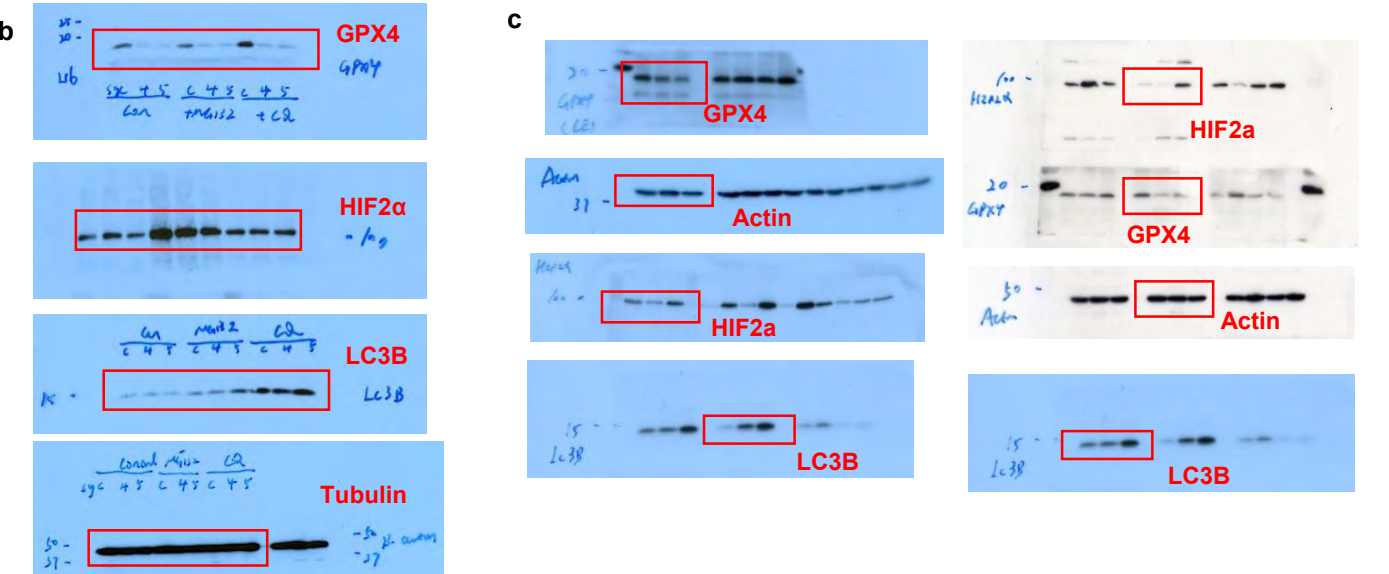

# Supplementary Figure 10 Uncropped blots

Fig. S2 d

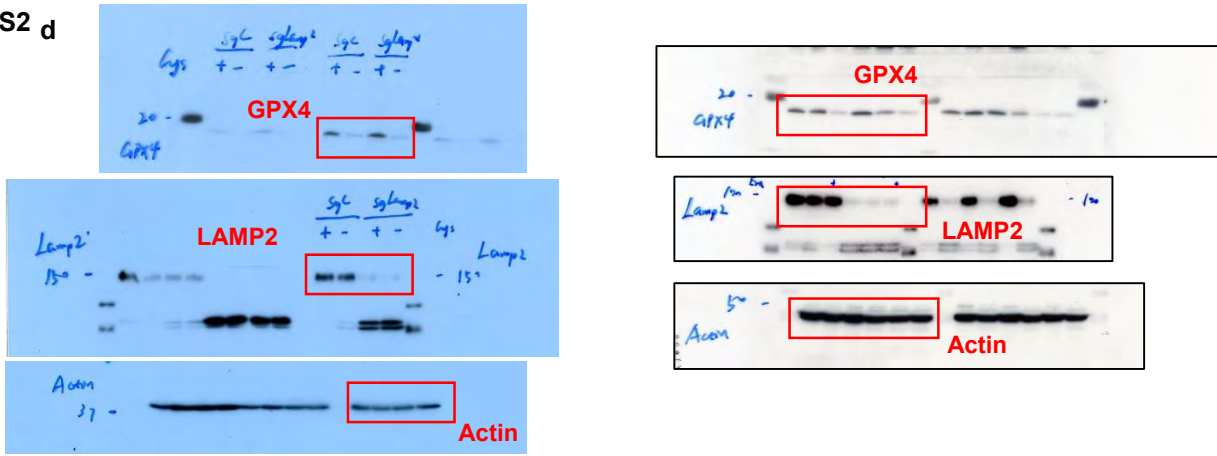

e

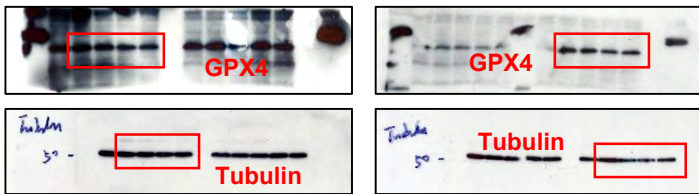

i

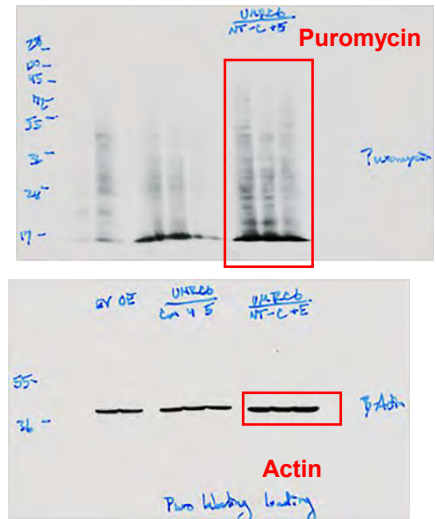

Fig. S4

c

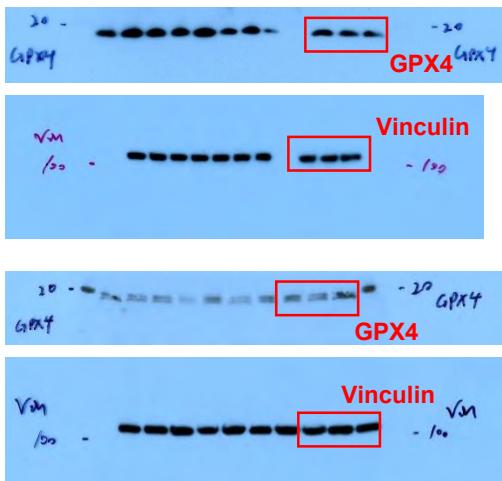

h

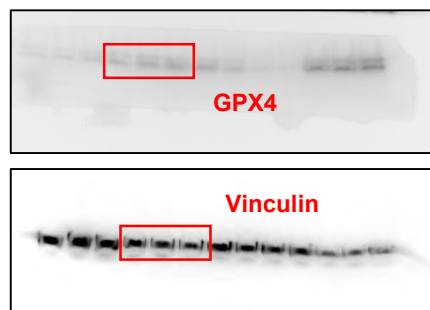

m

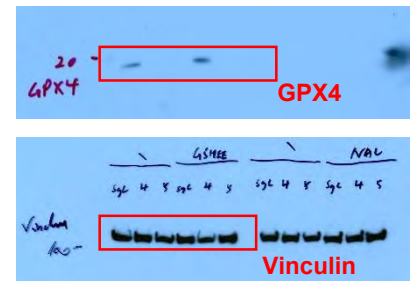

# Supplementary Figure 10 Uncropped blots

Fig. S5

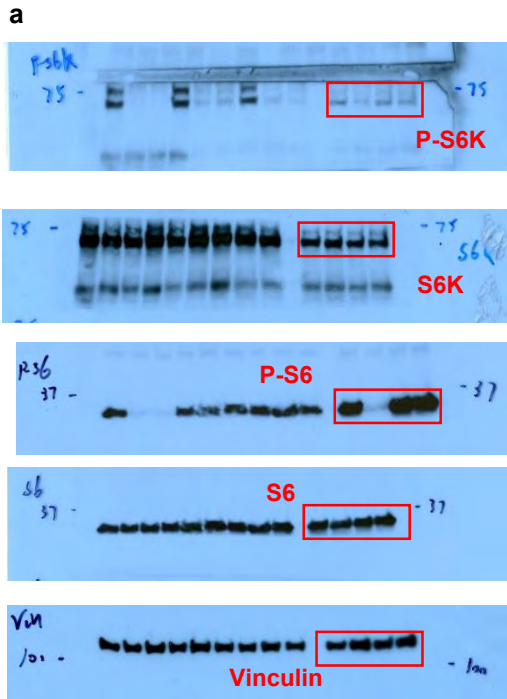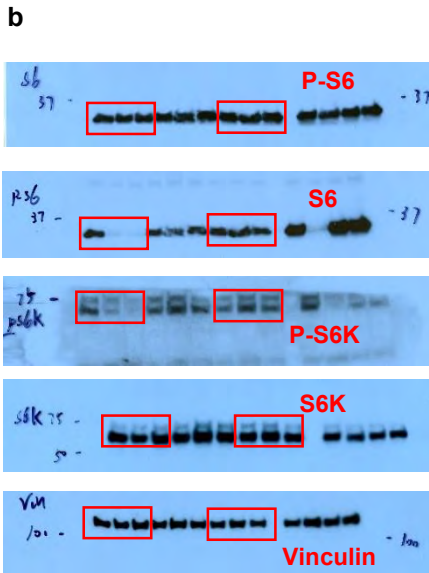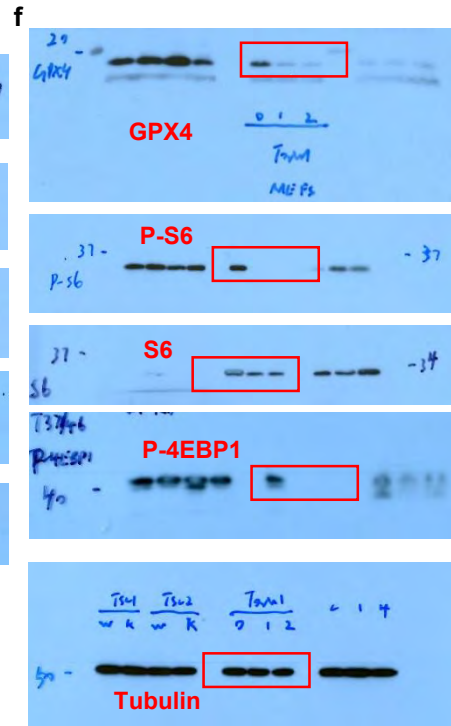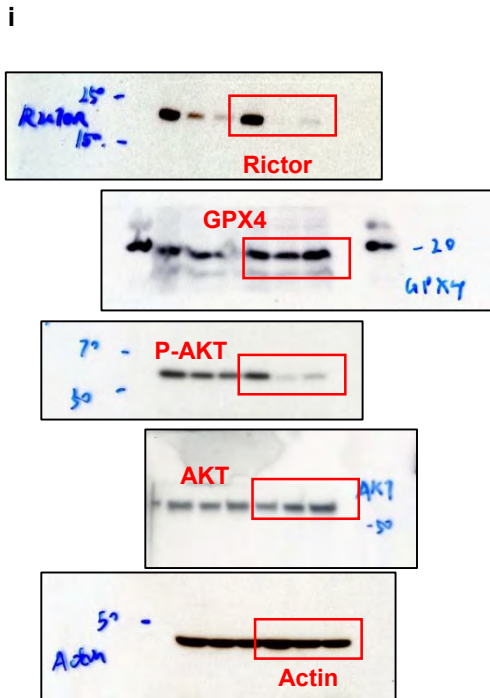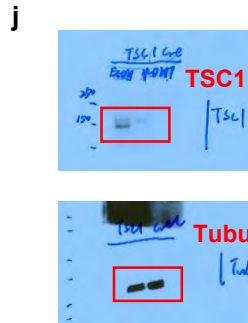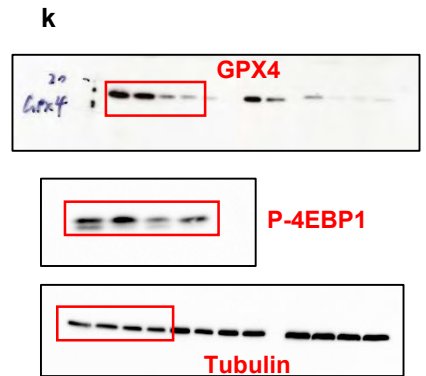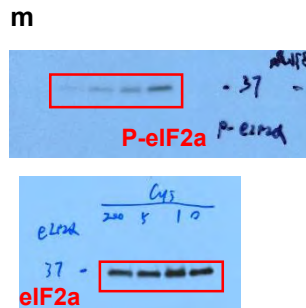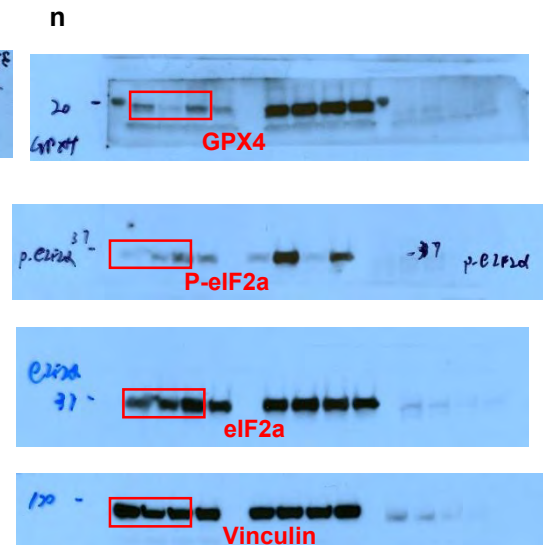

Fig. S8

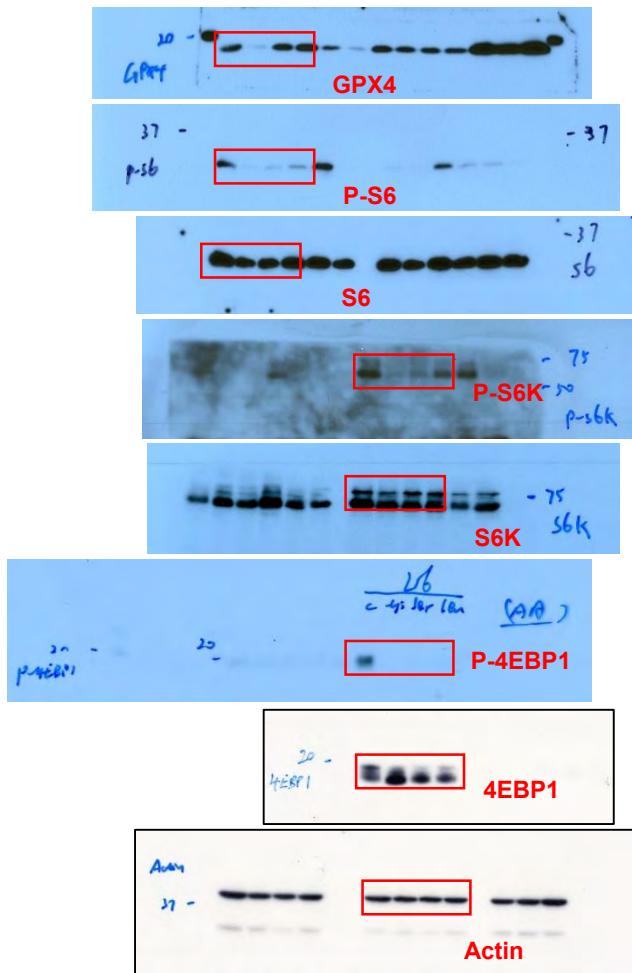

Supplement: 41467_2021_21841_MOESM1_ESM.pdf [file 41467_2021_21841_MOESM1_ESM.pdf]
